# Supplementary material for: TDP-1, the Caenorhabditis elegans ortholog of TDP-43, limits the accumulation of double-stranded RNA
Source: PubMed Central journal article supplement (PMC4282642; doi:10.15252/embj.201488740), 2014-11-12

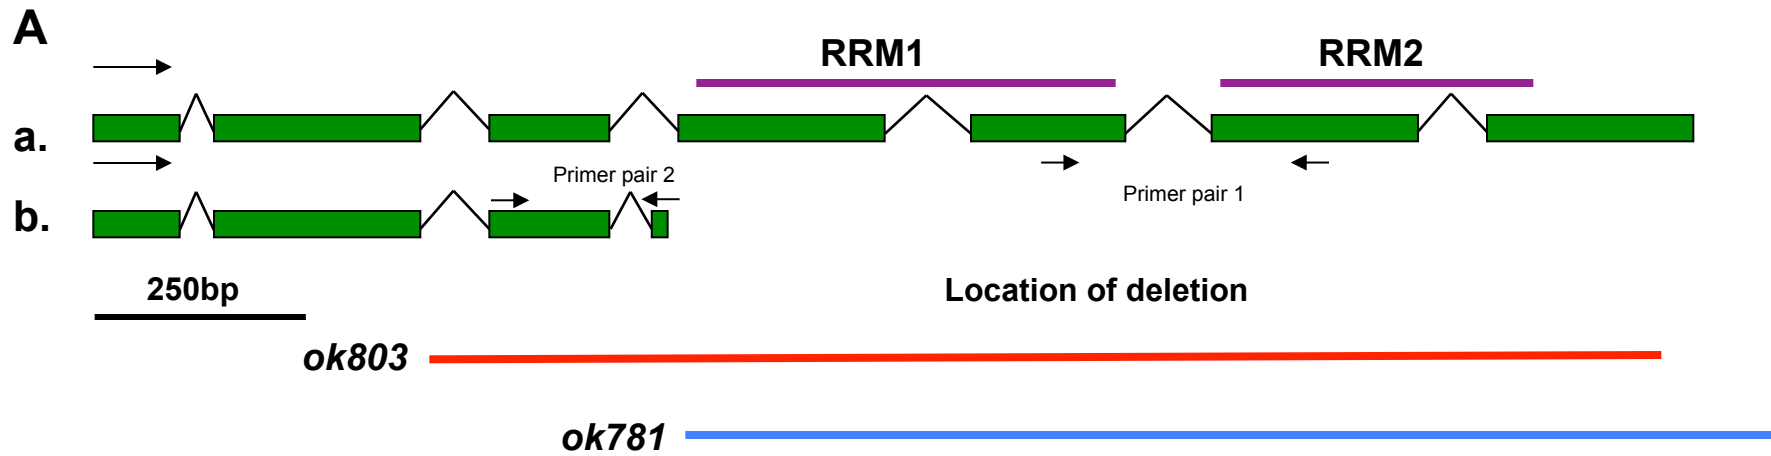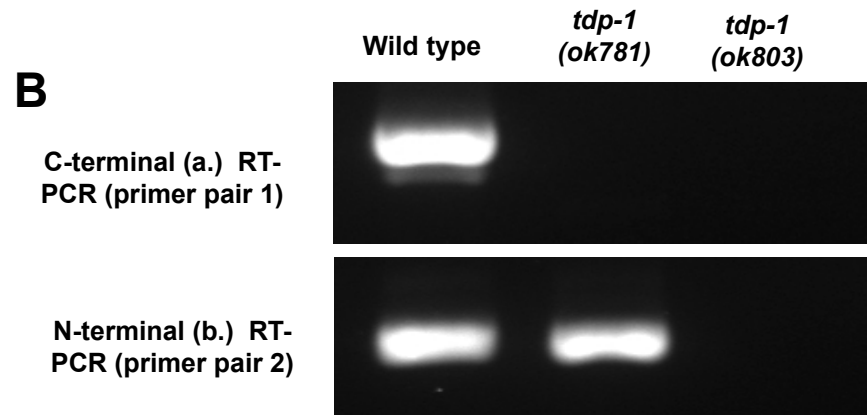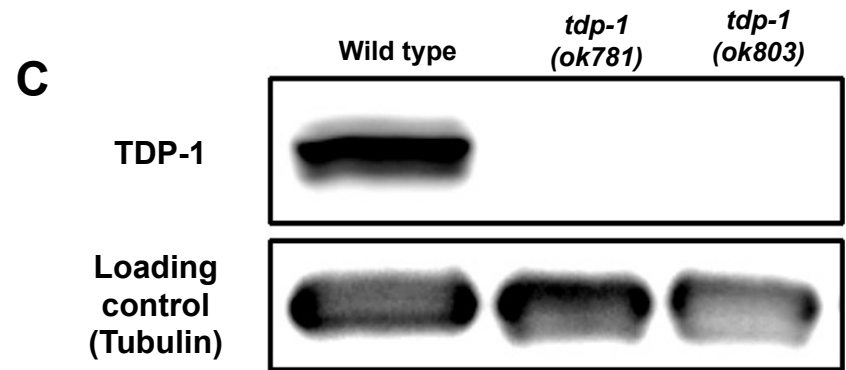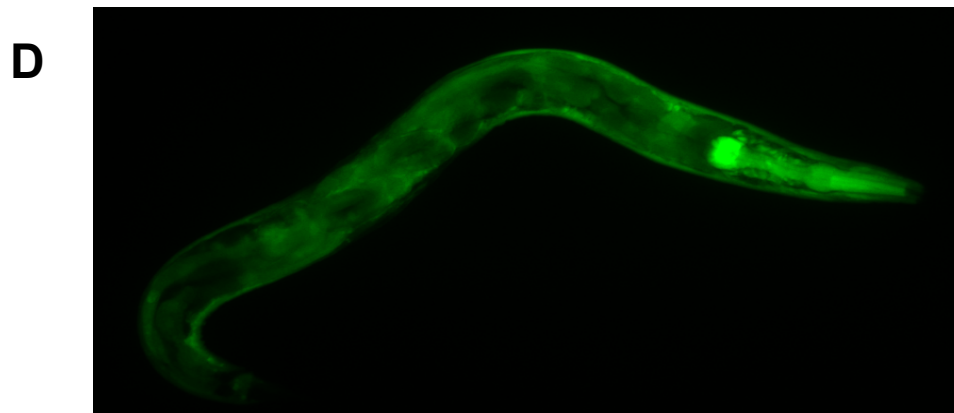

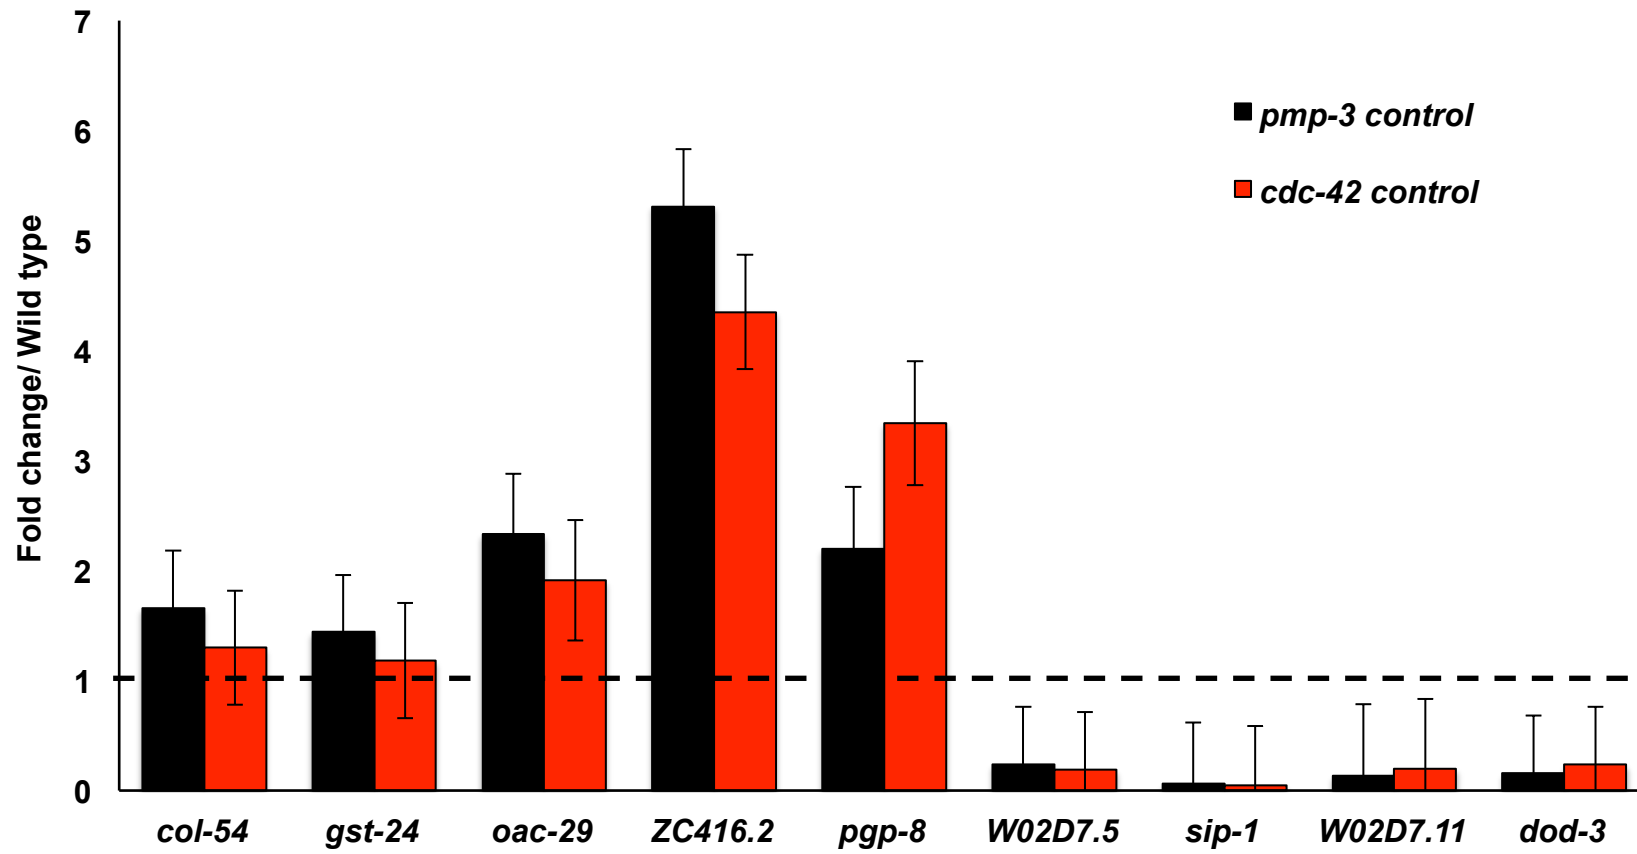

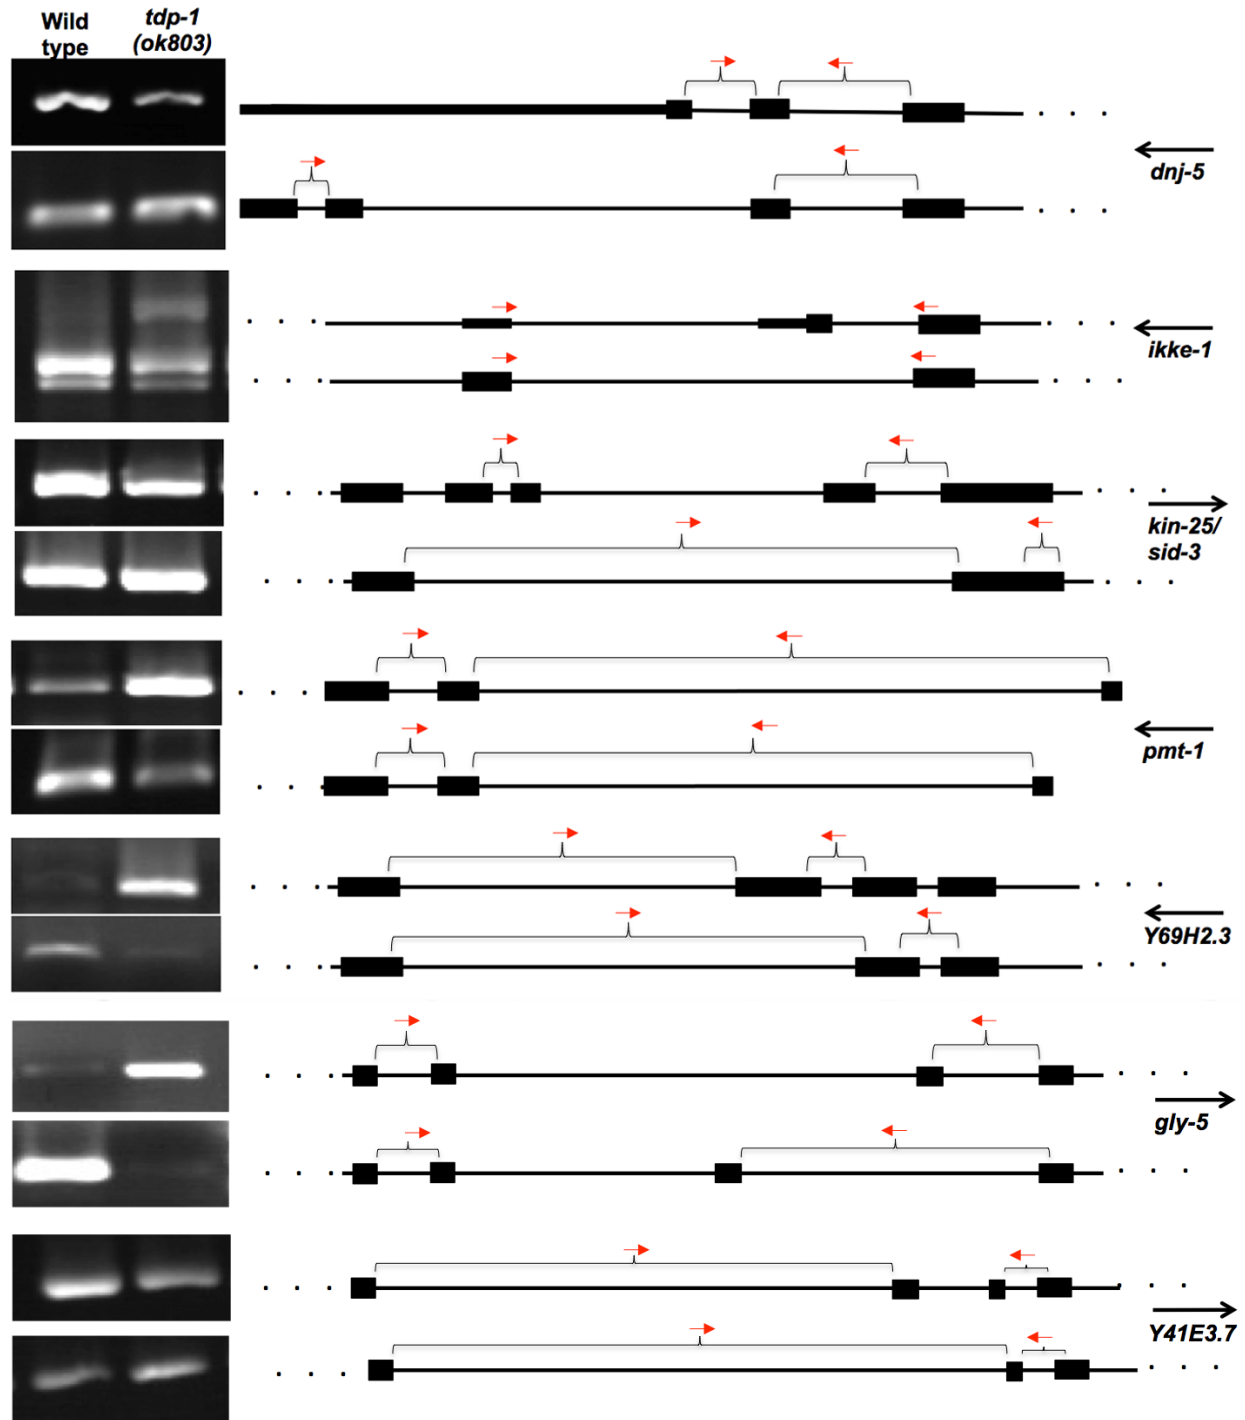

**A**

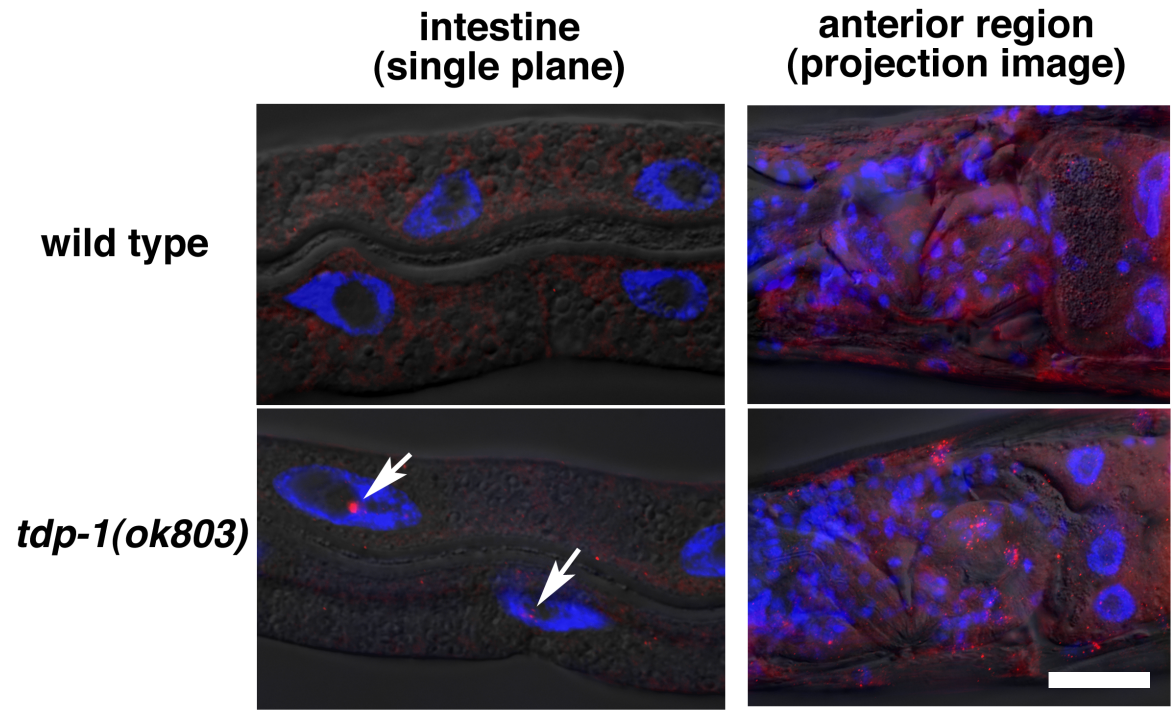

**B**

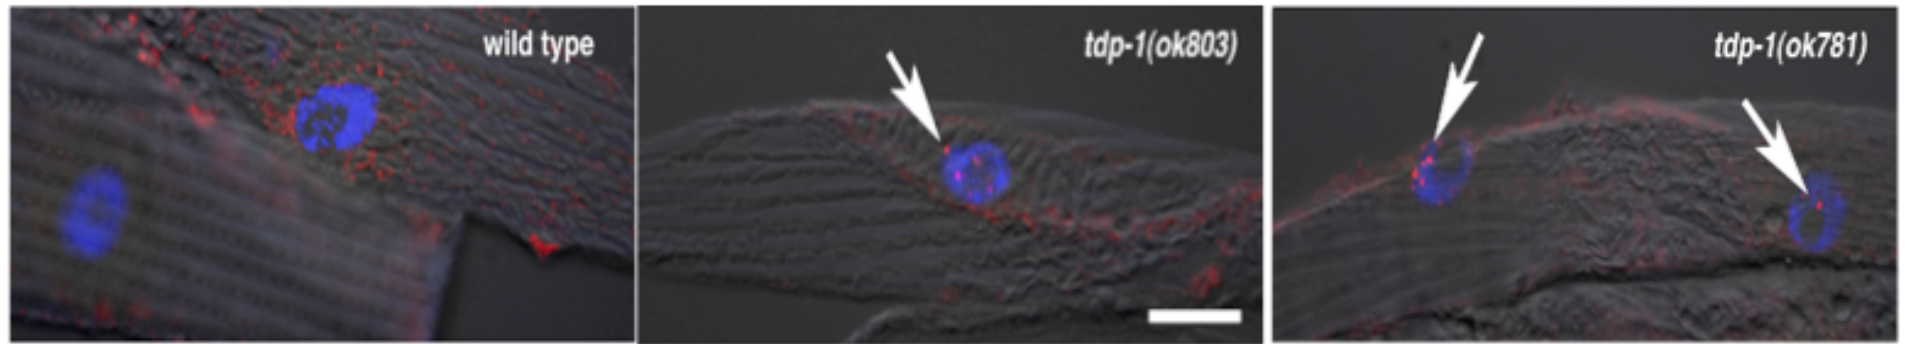



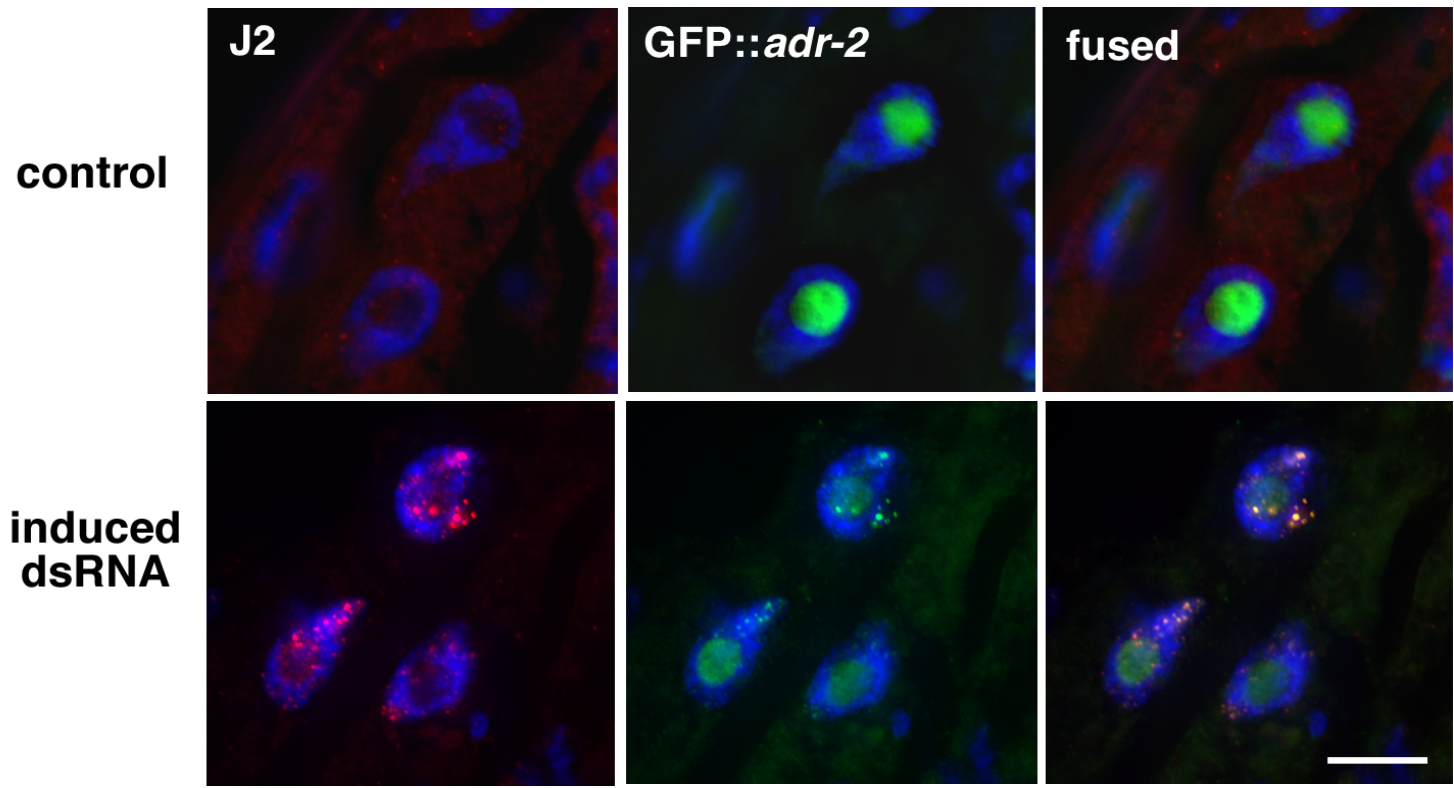

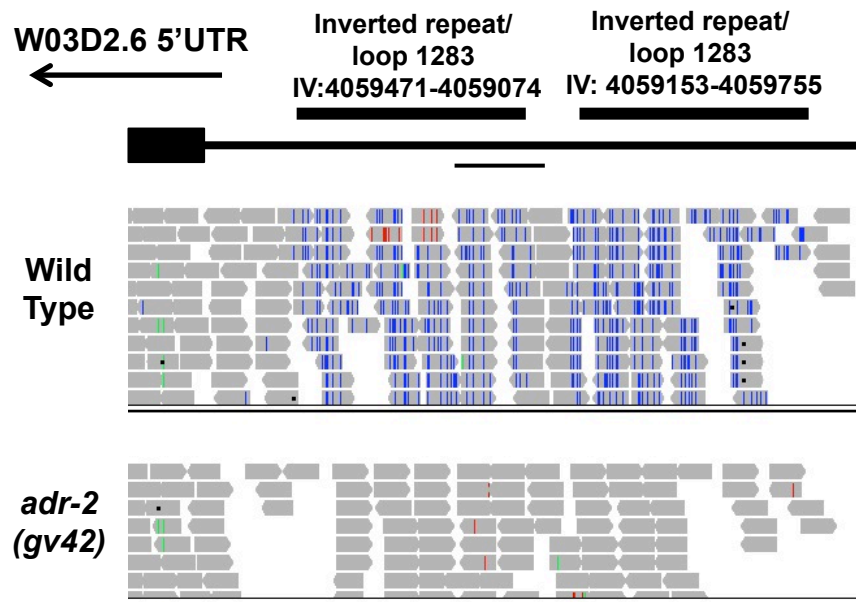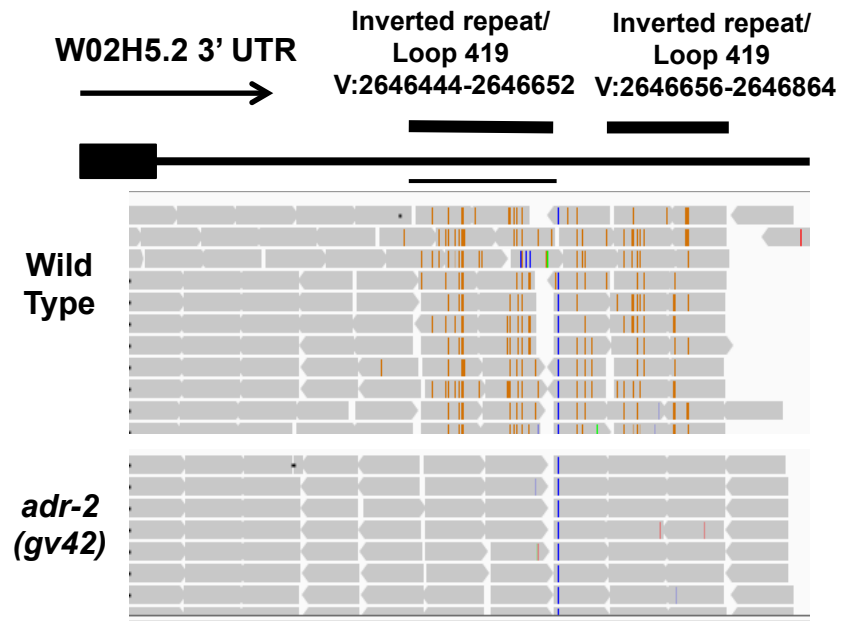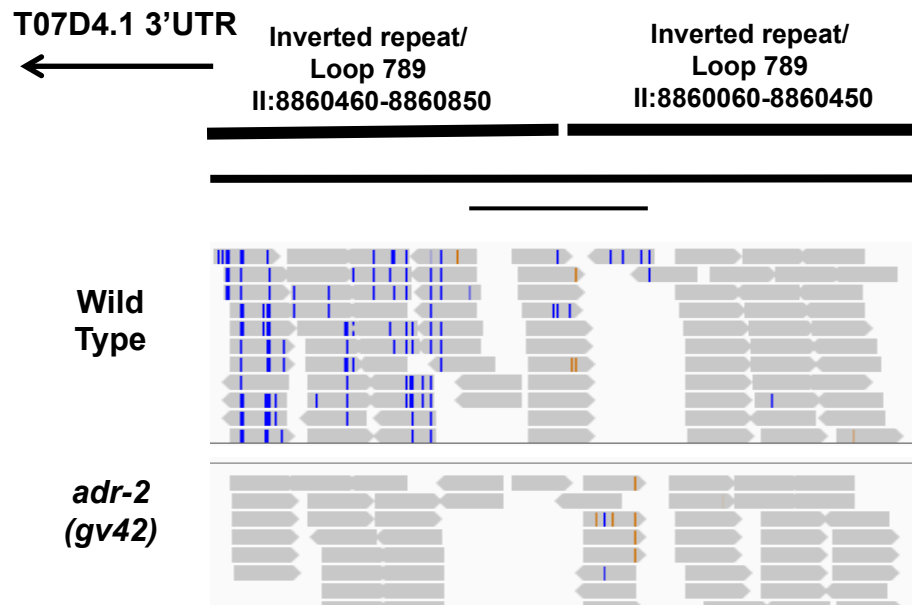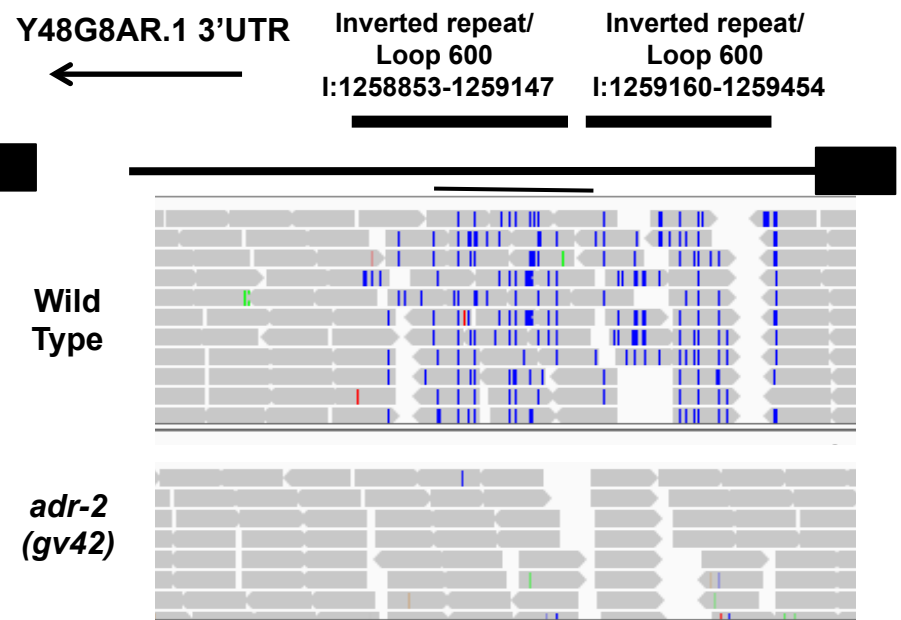

**A**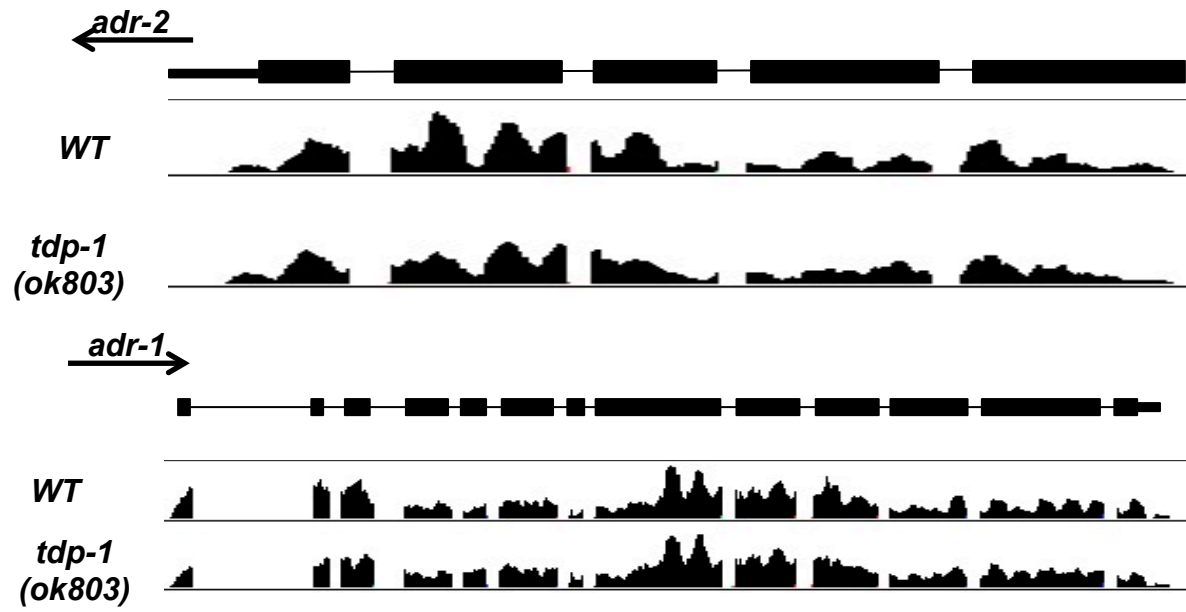**B**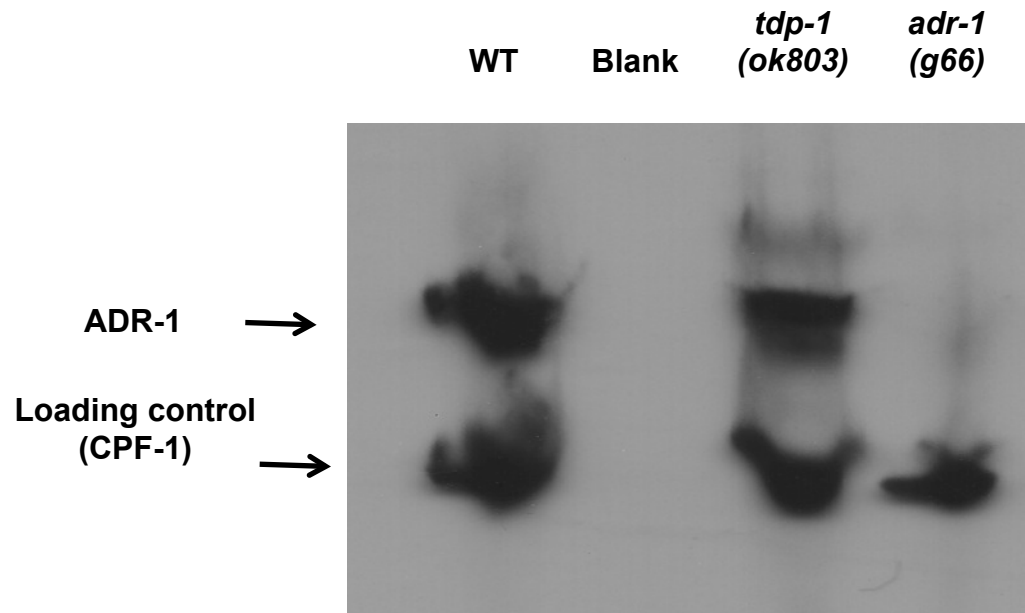

**A**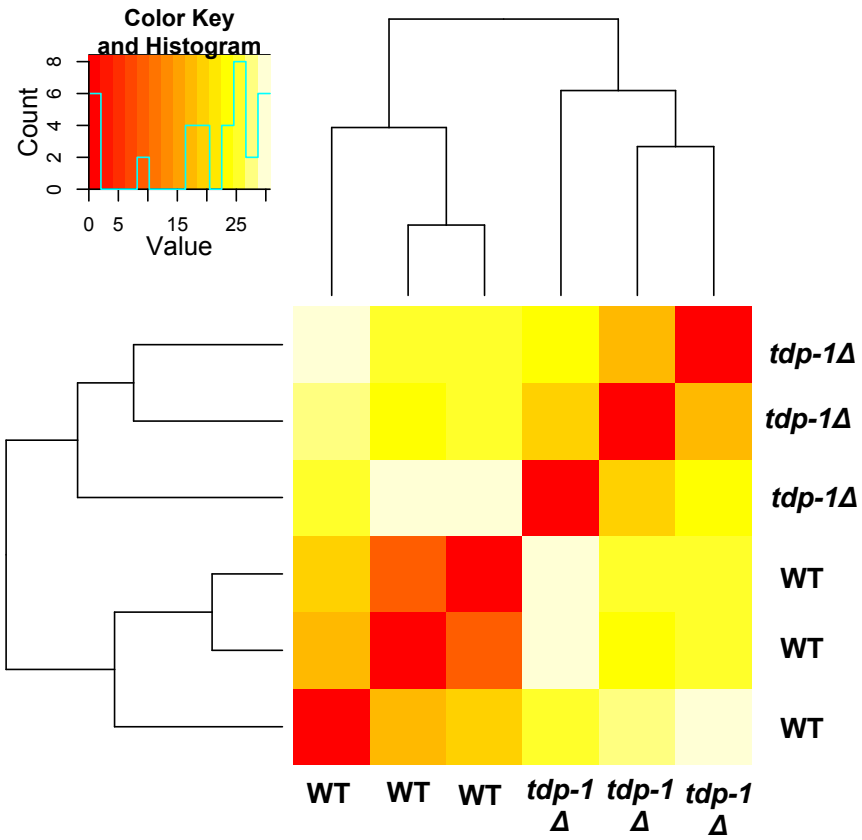**B**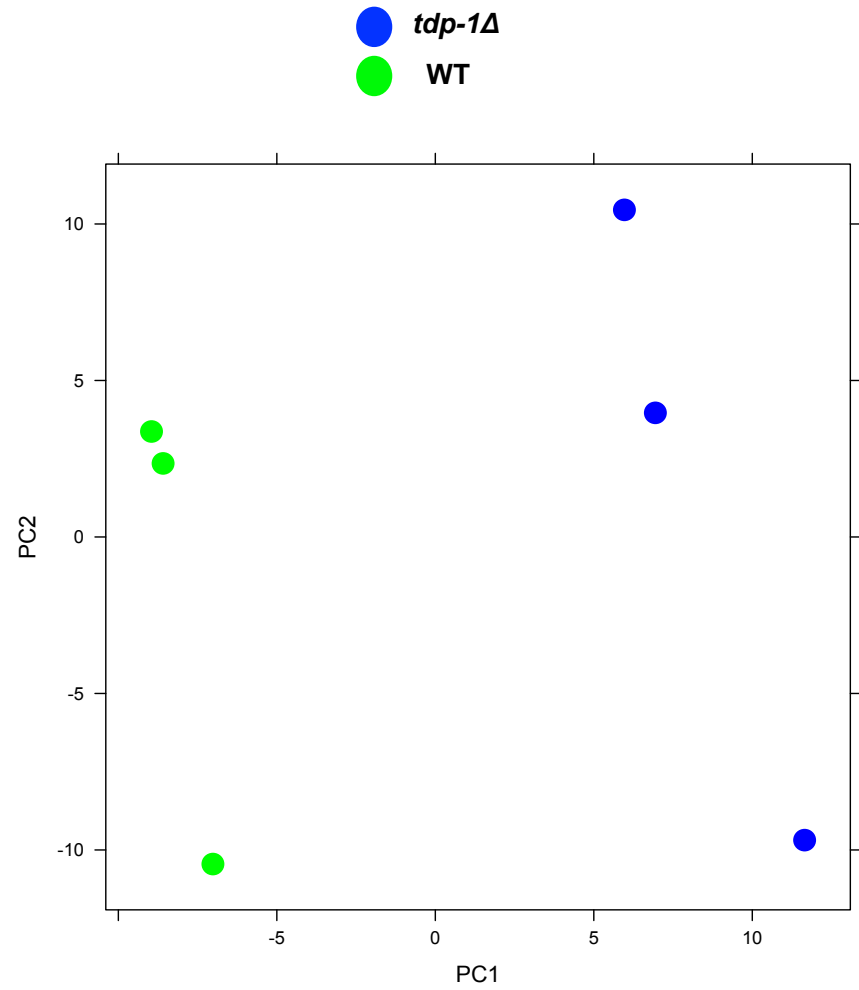

**A**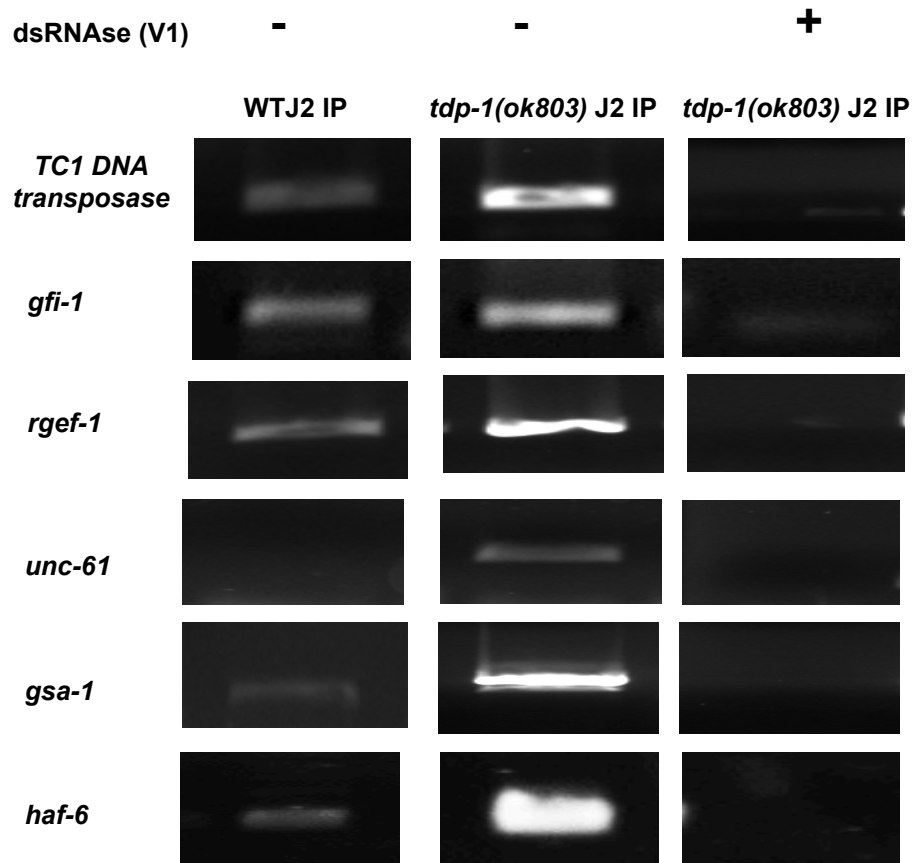**B**

Fold increase J2-IP/input

| WTJ2 IP  | <i>tdp-1(ok803)</i> J2 IP |
|----------|---------------------------|
| 3.3-fold | 7-fold                    |
| 2-fold   | 3.7-fold                  |
| 1.1-fold | 2.1-fold                  |
| 1.2-fold | 1.9-fold                  |
| 1.3 fold | 5-fold                    |
| 2.4-fold | 4.6-fold                  |

*let-2*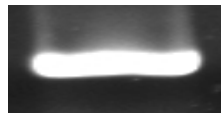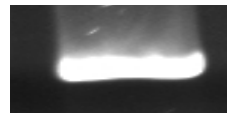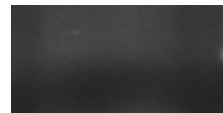

1.1-fold

1.2-fold

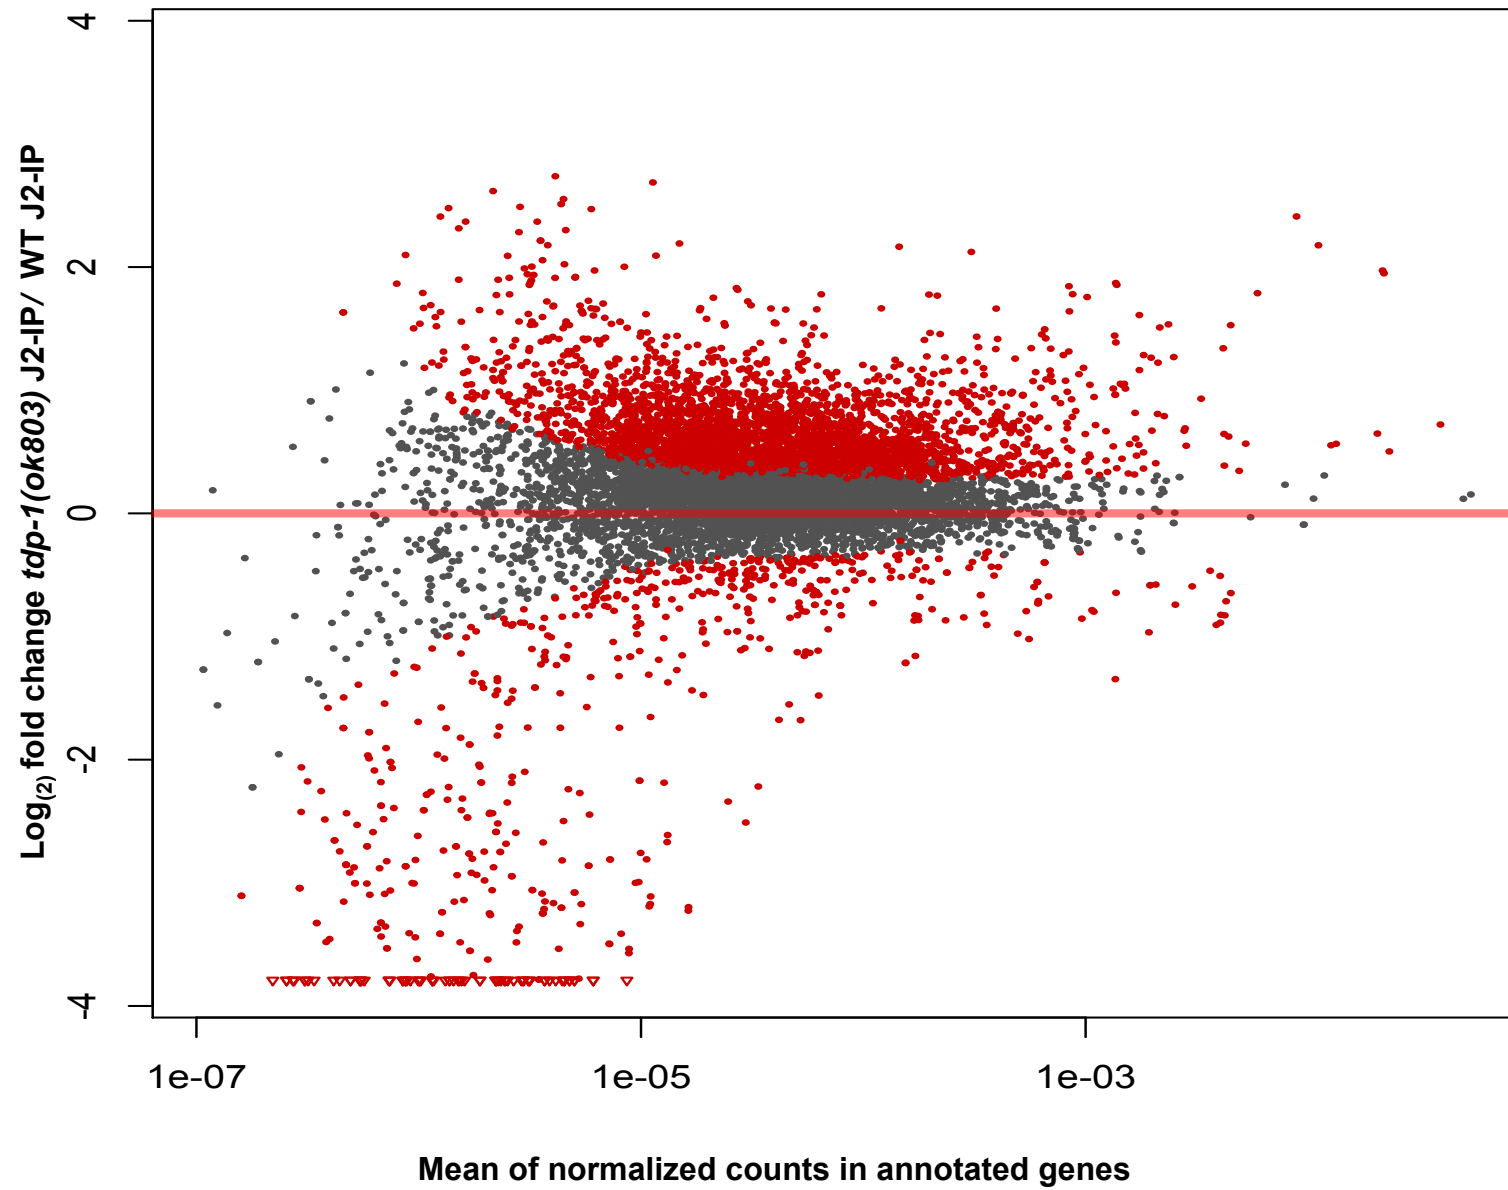

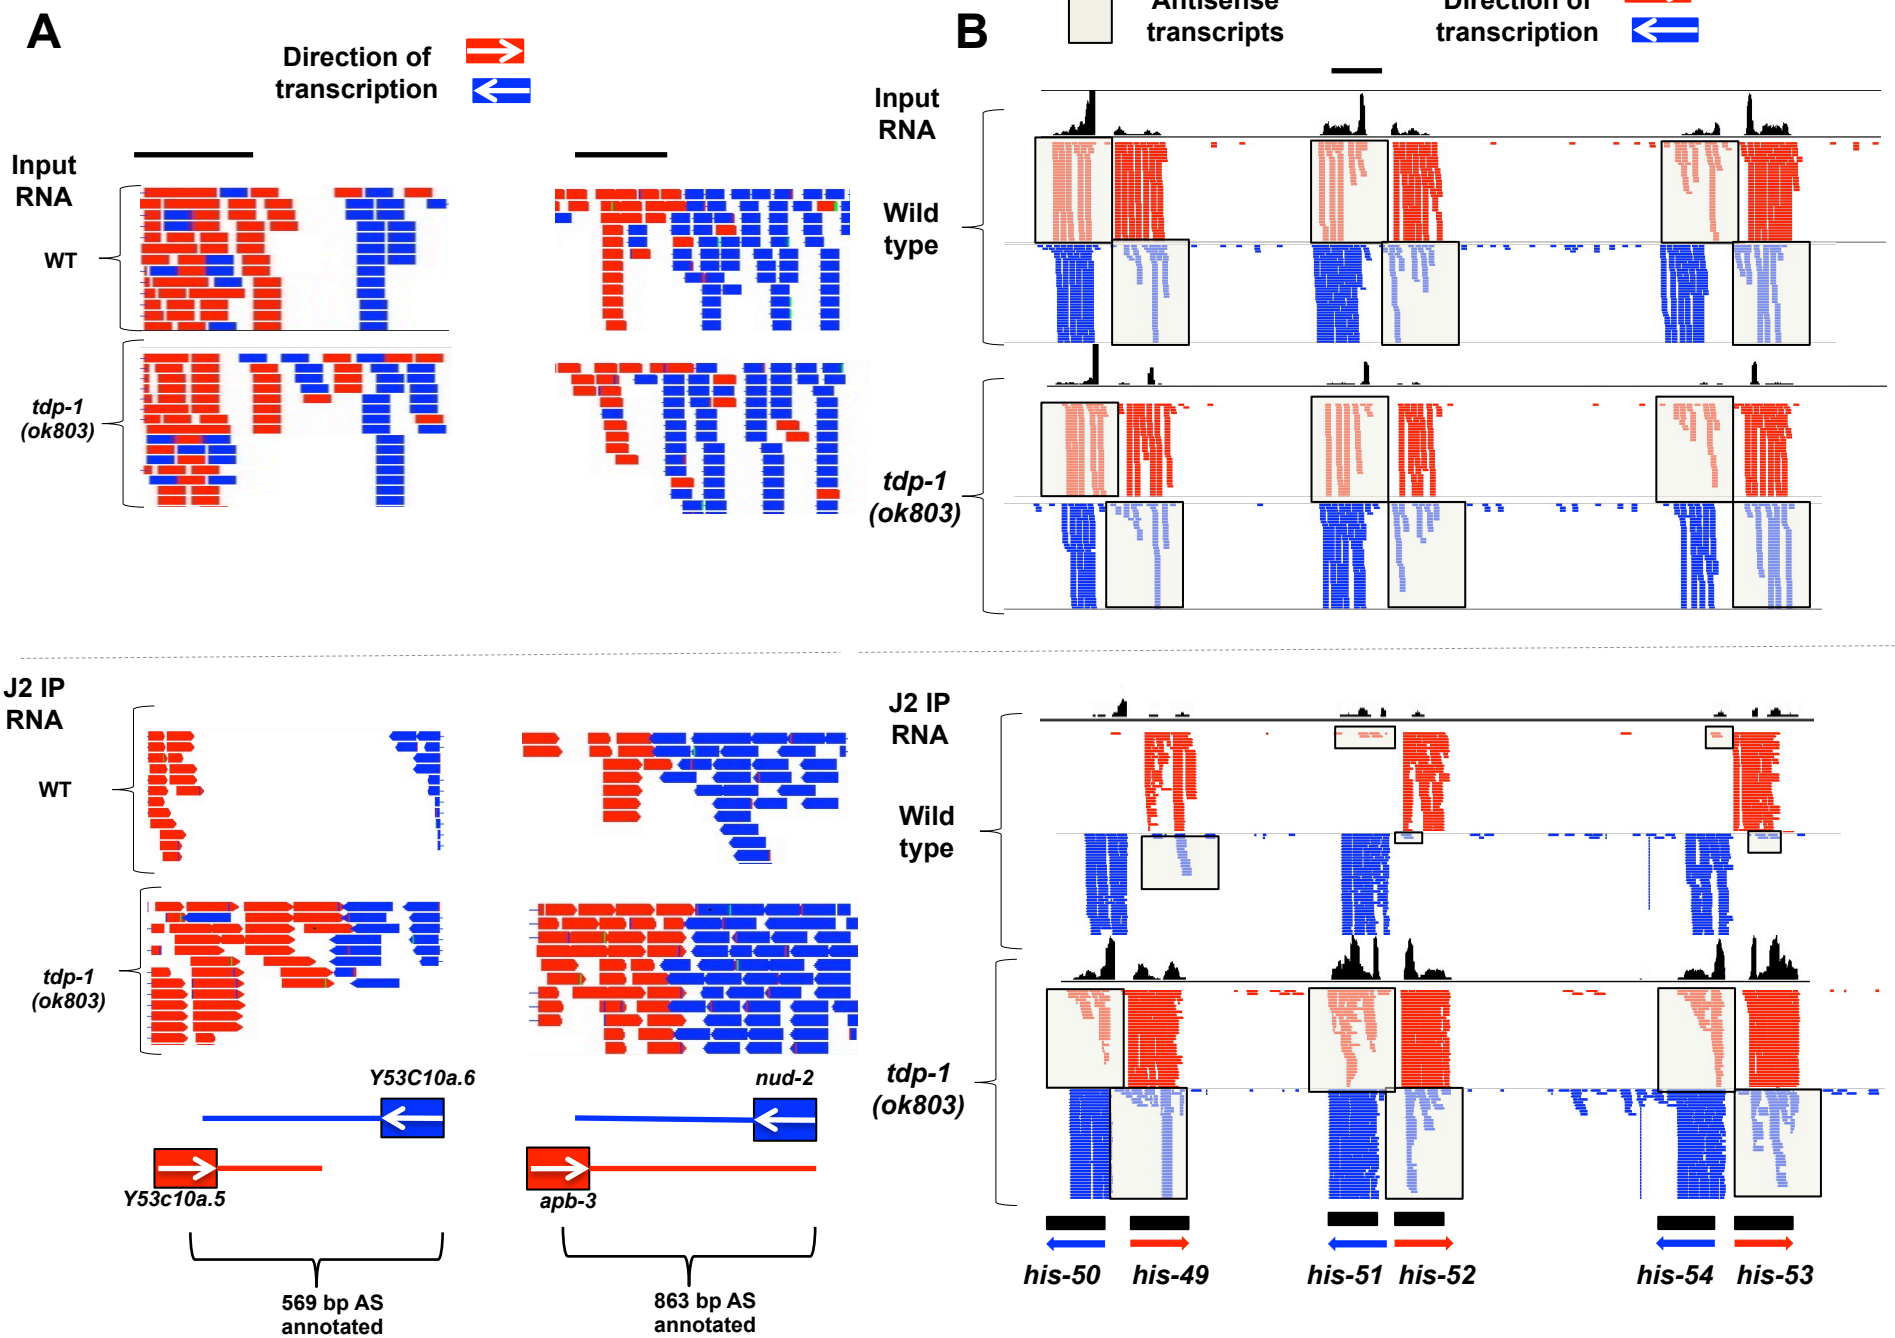

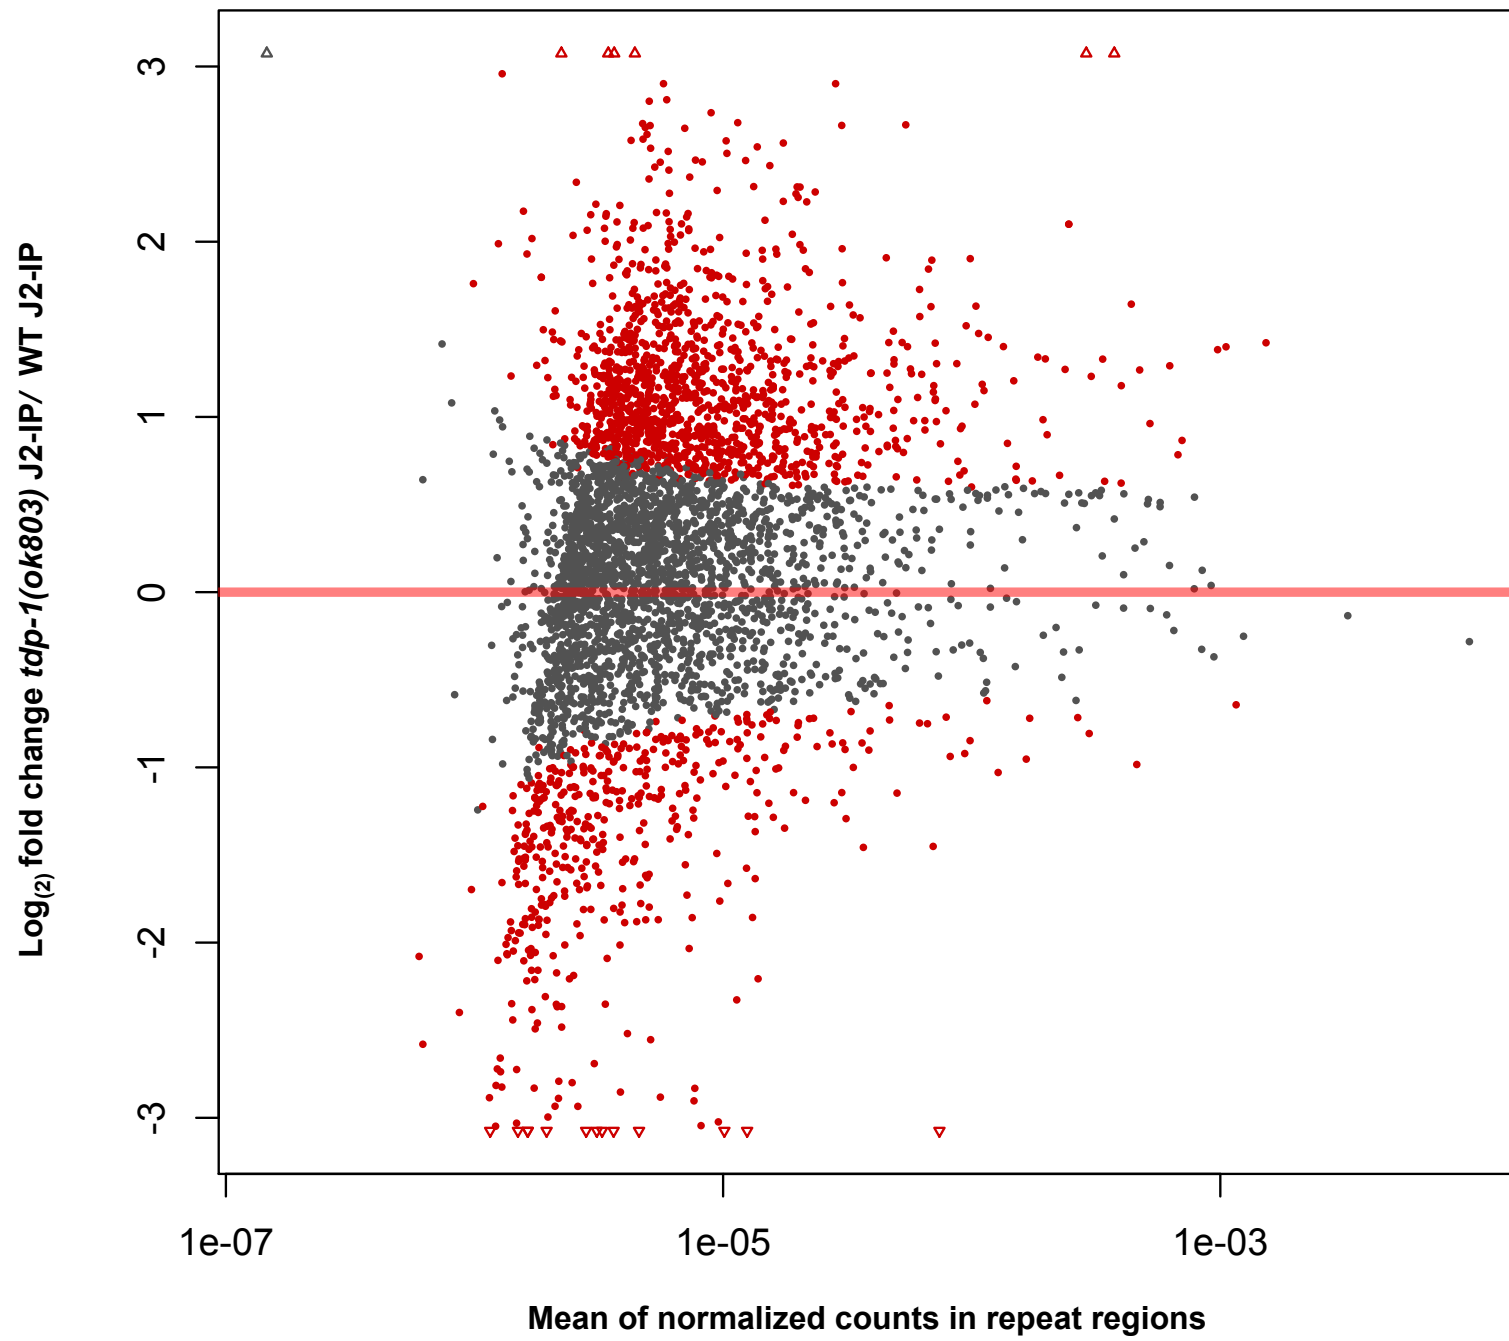



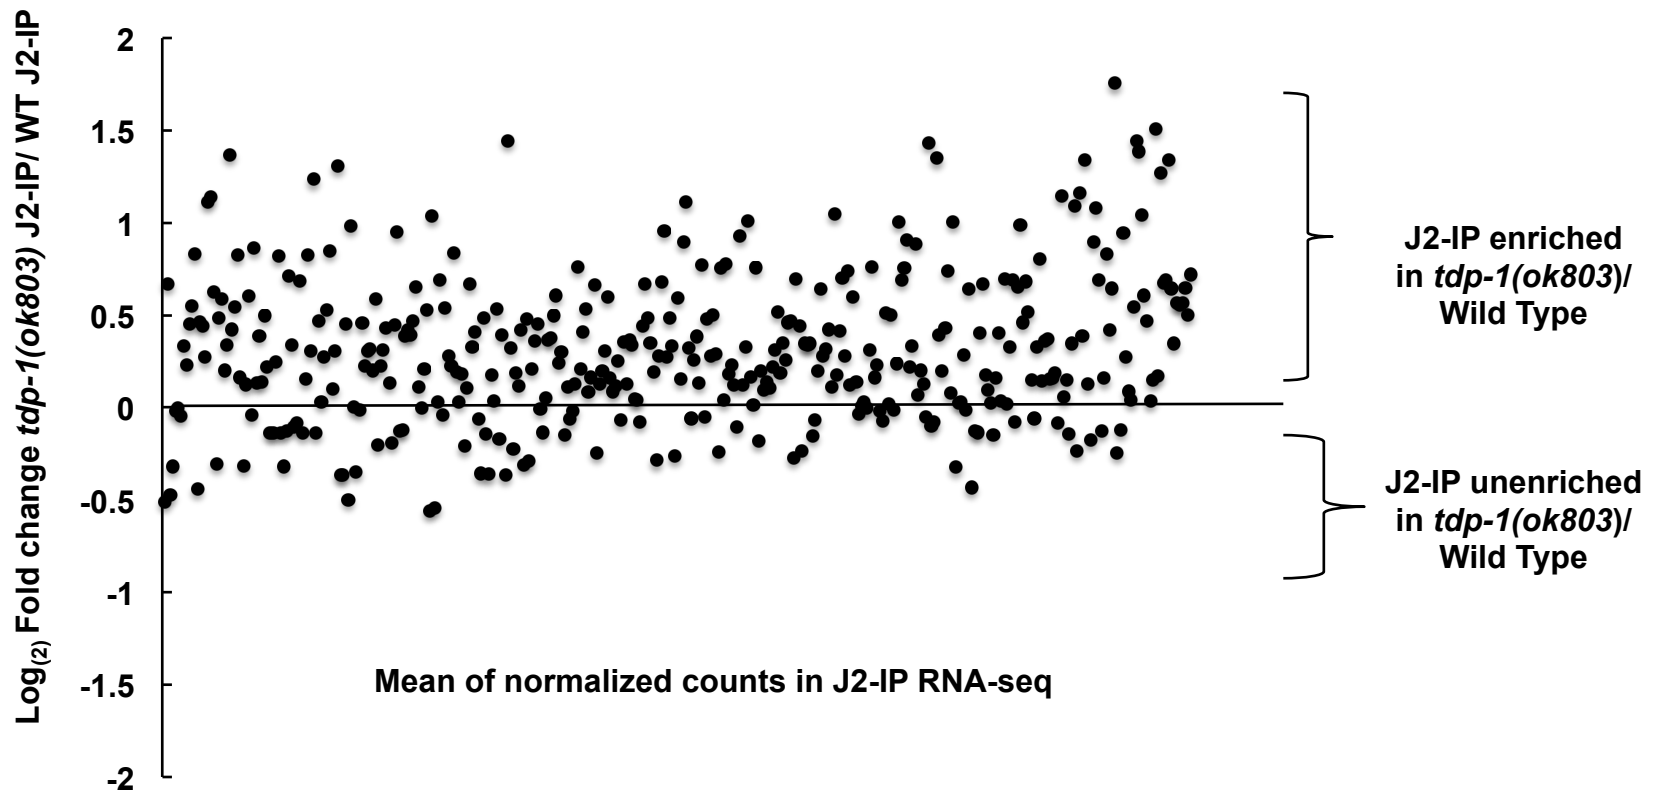

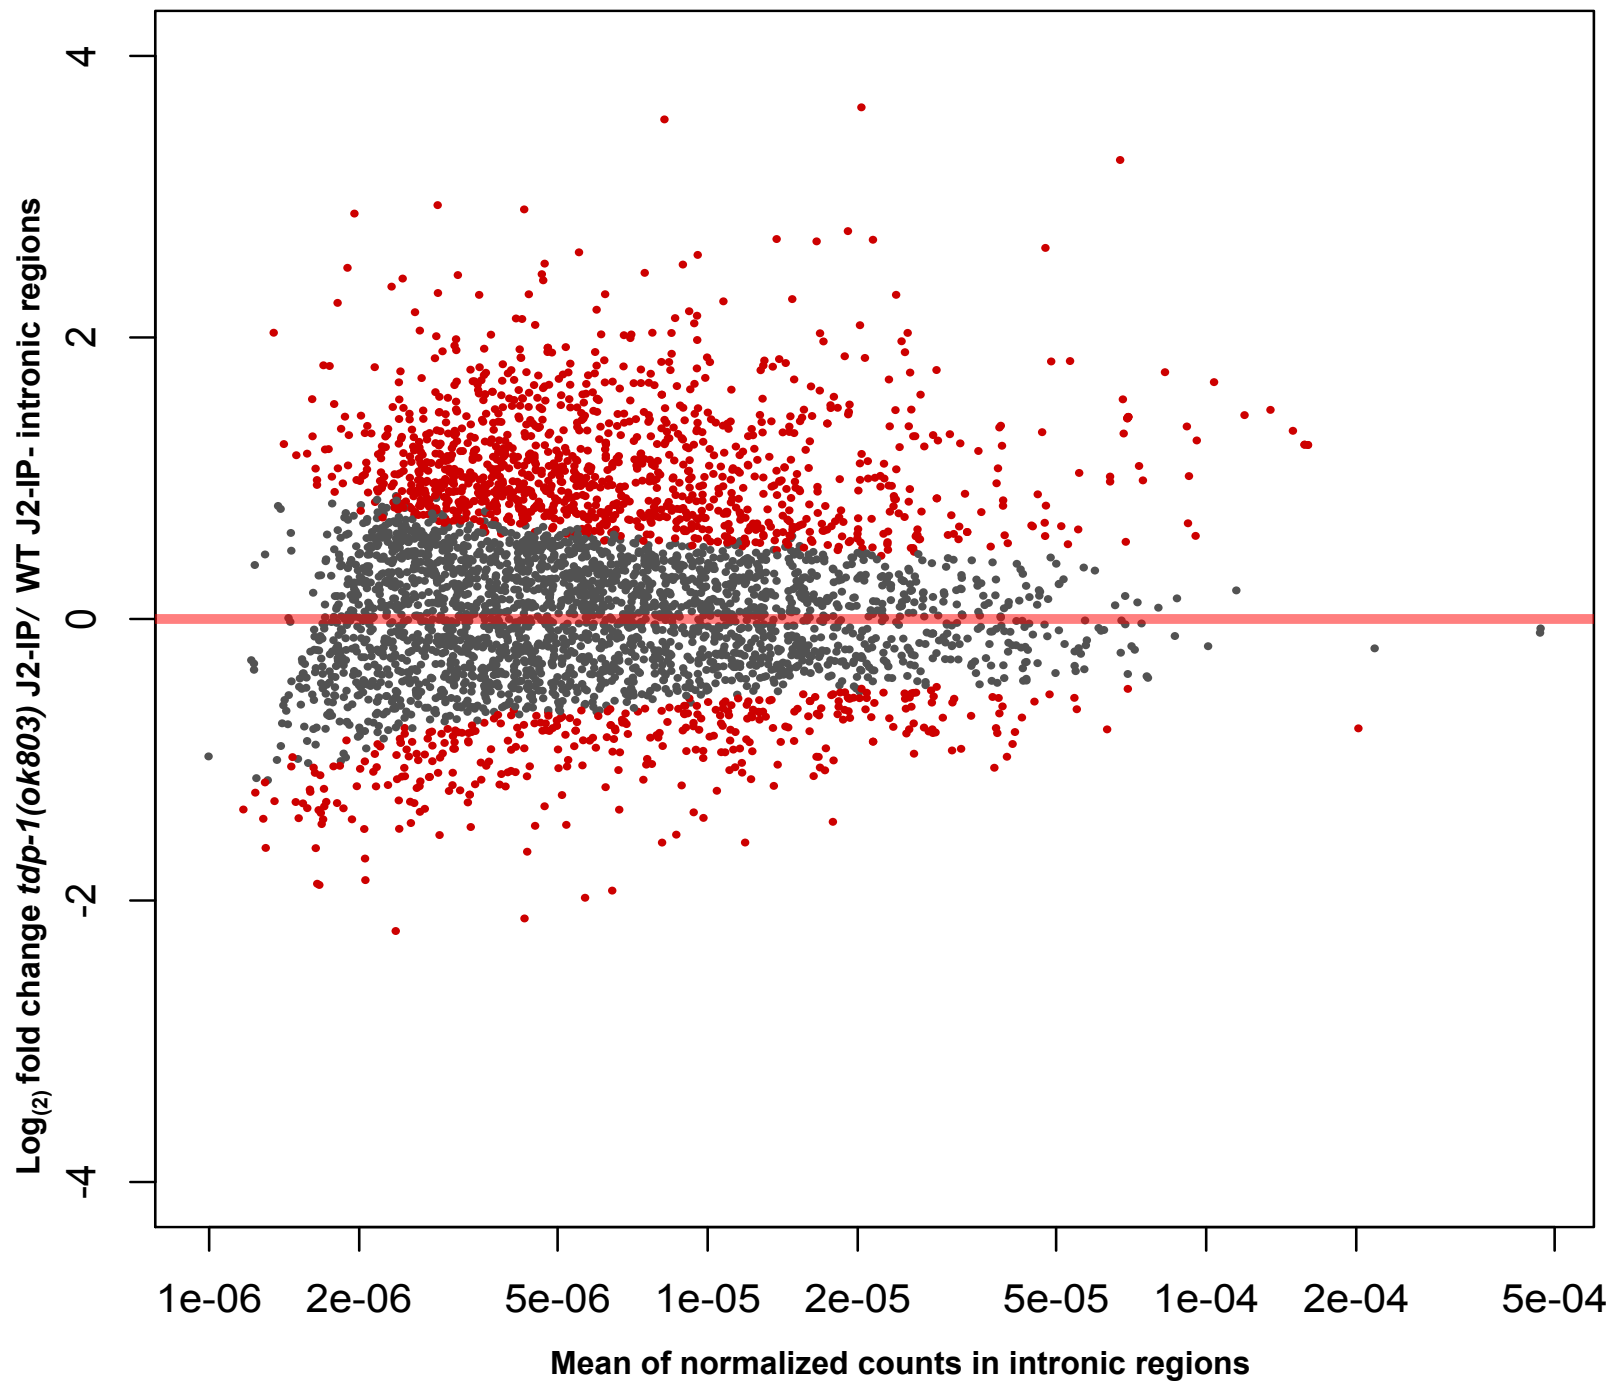

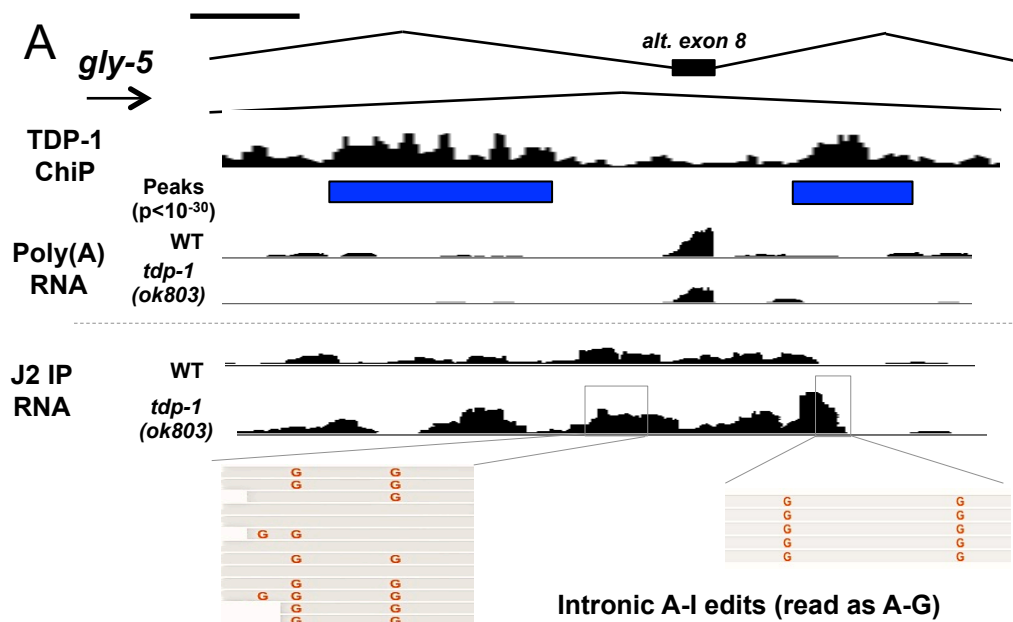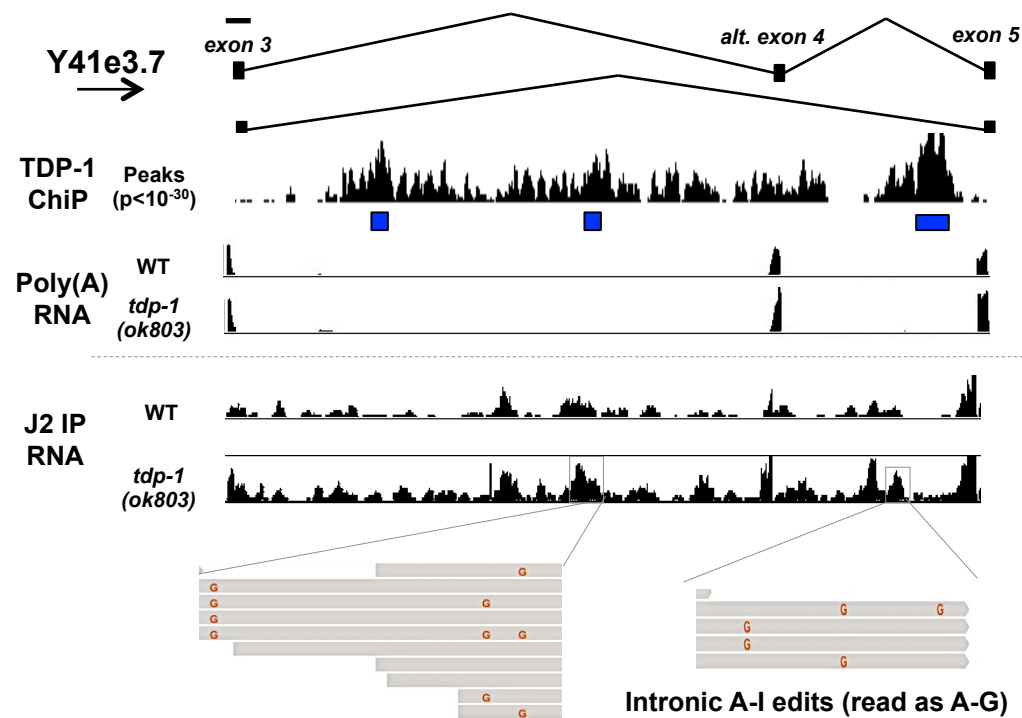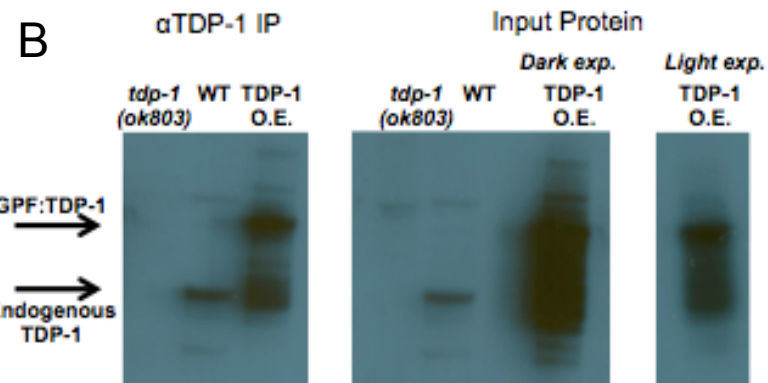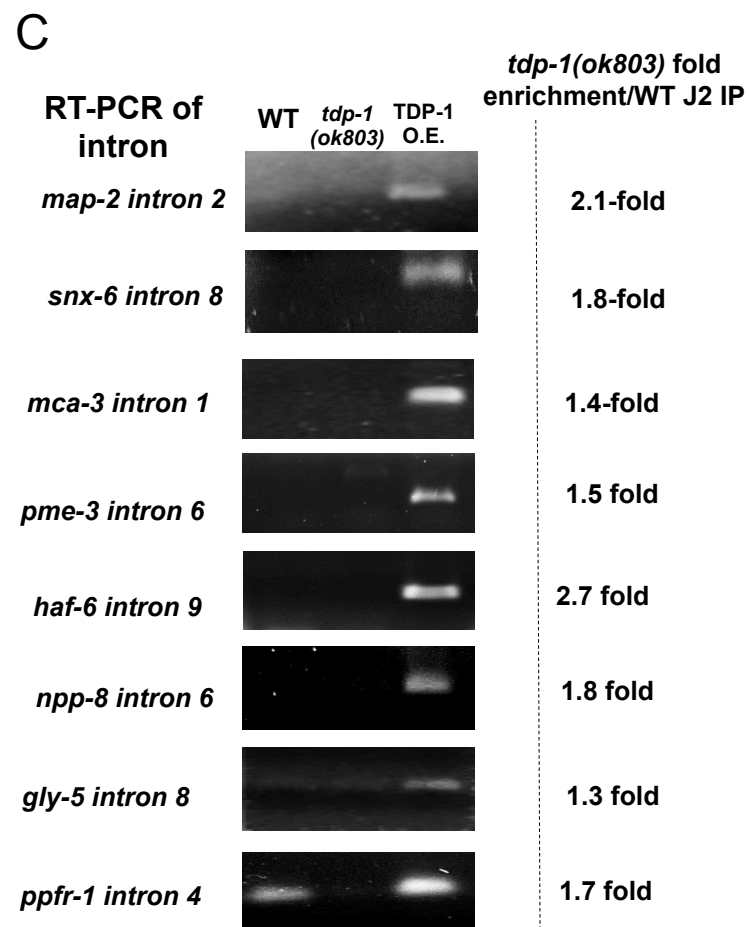

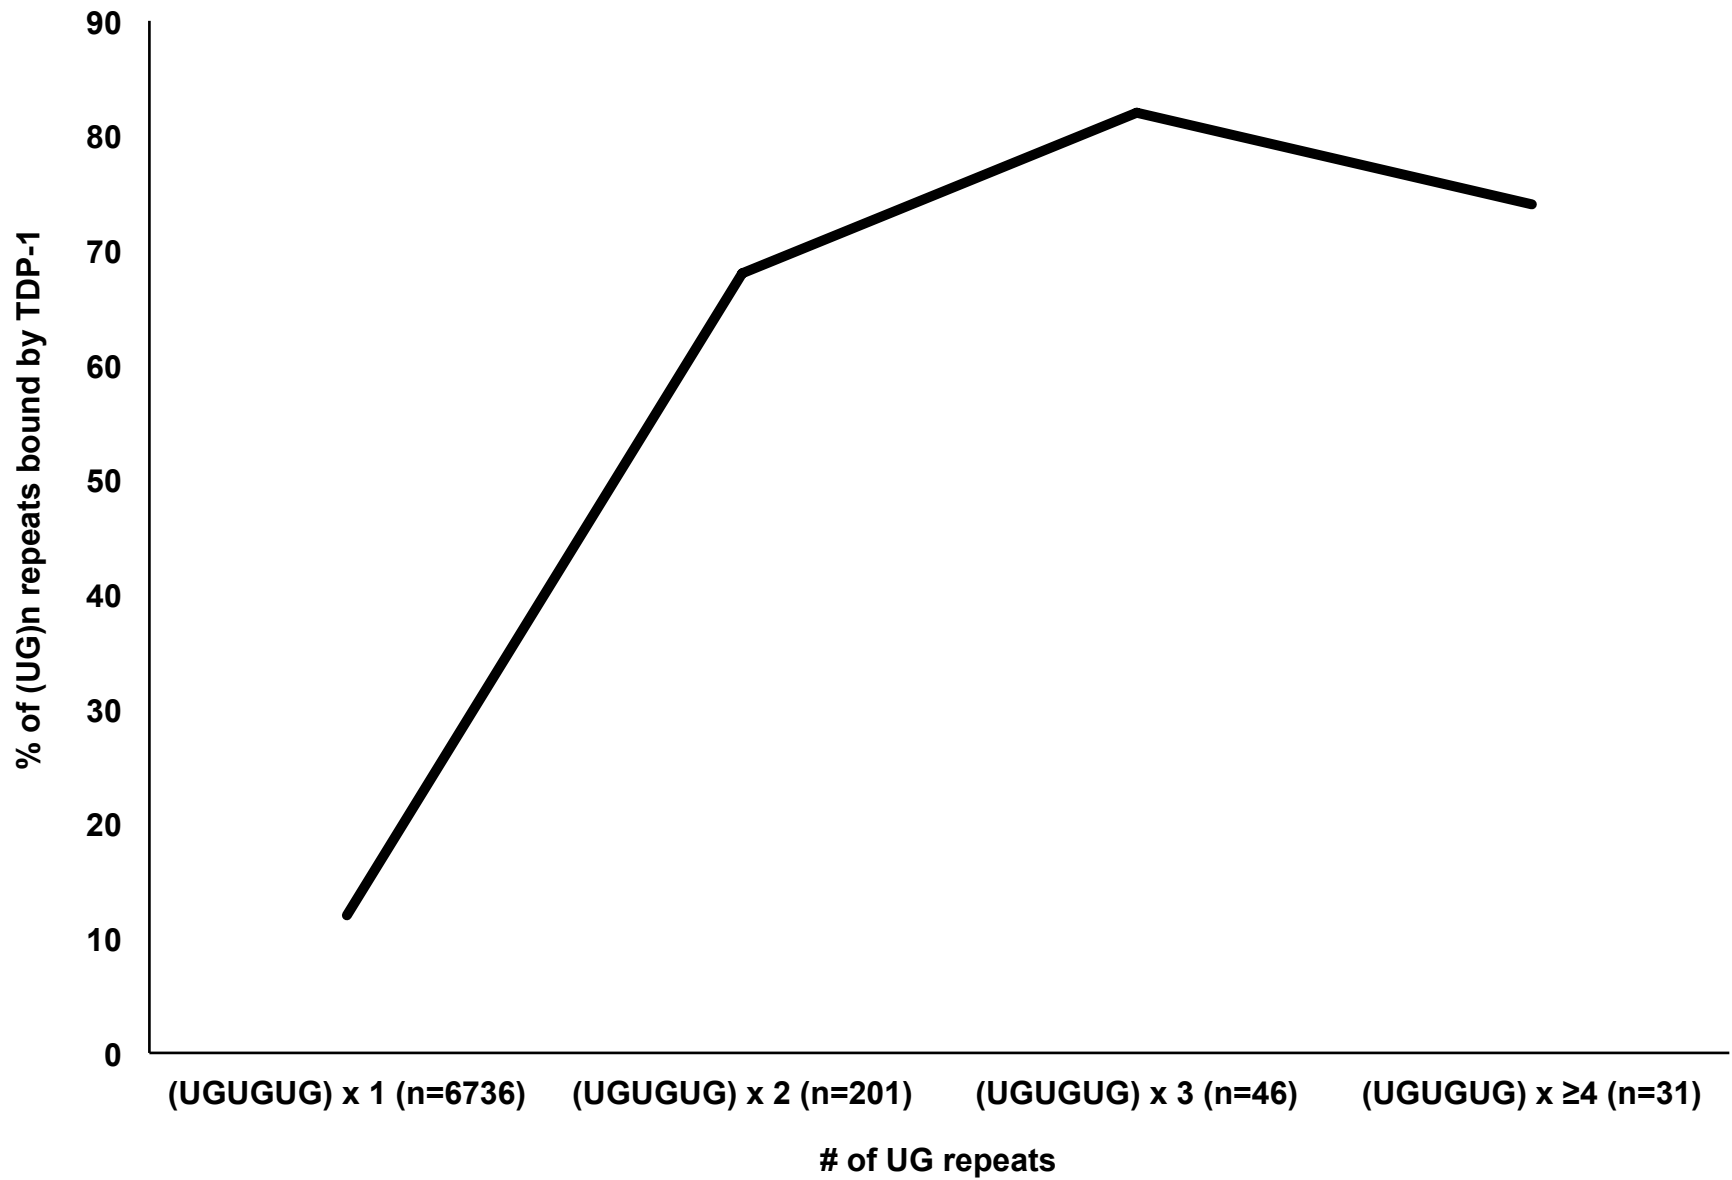

**A**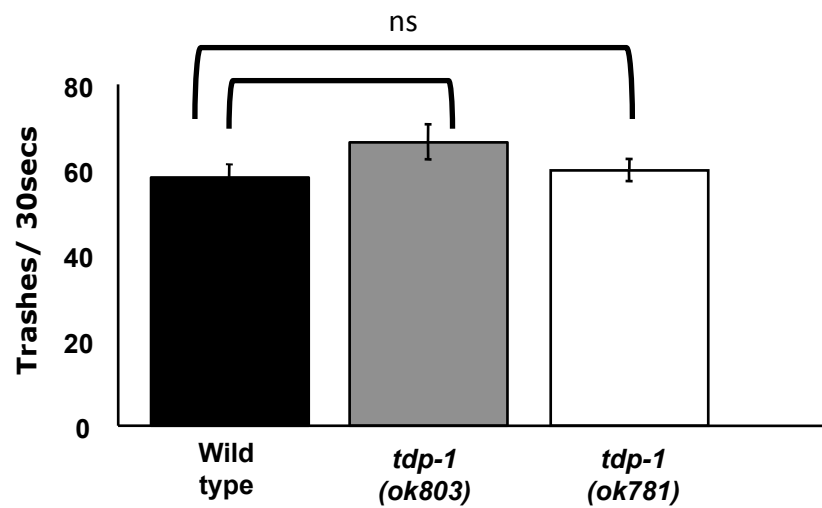

1% Butanone

**B**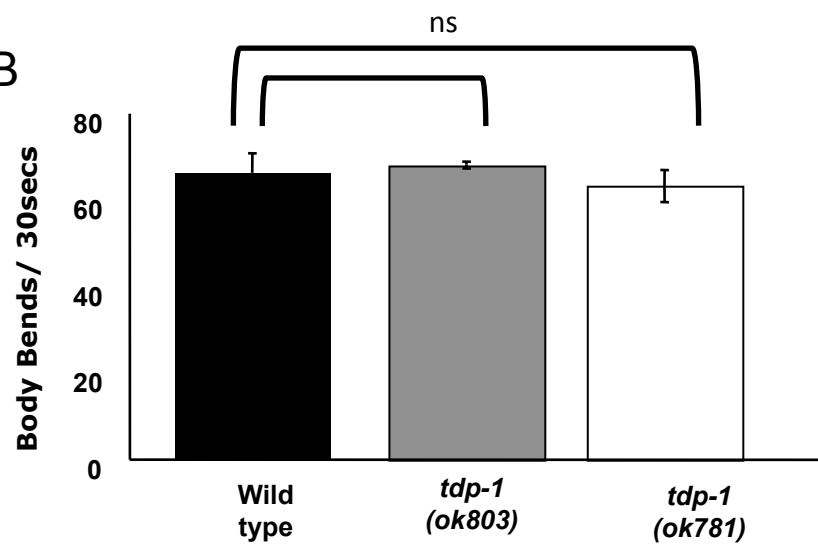

1% Isoamyl alcohol

**C**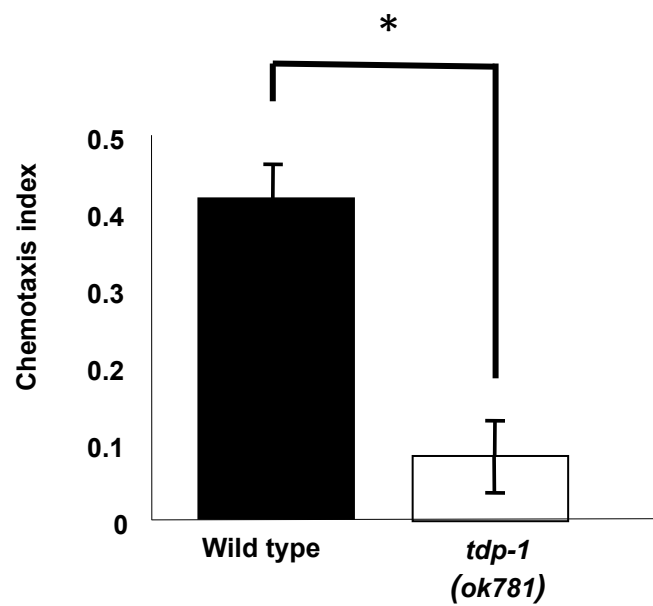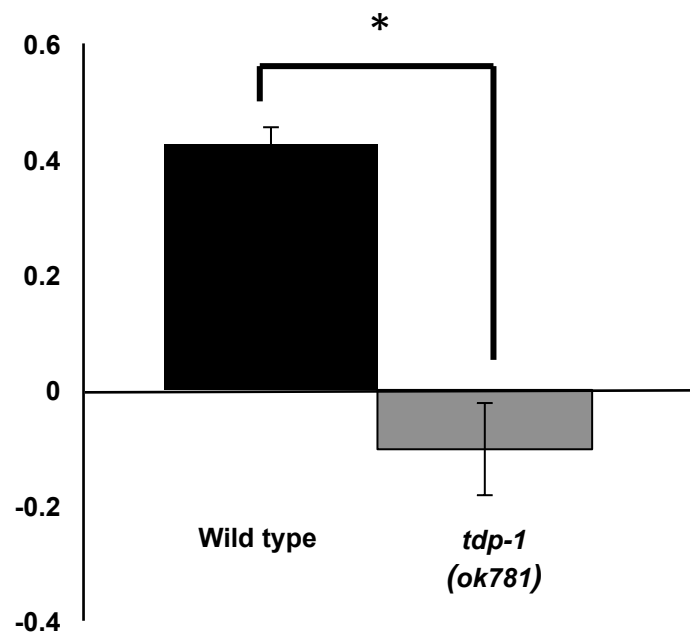

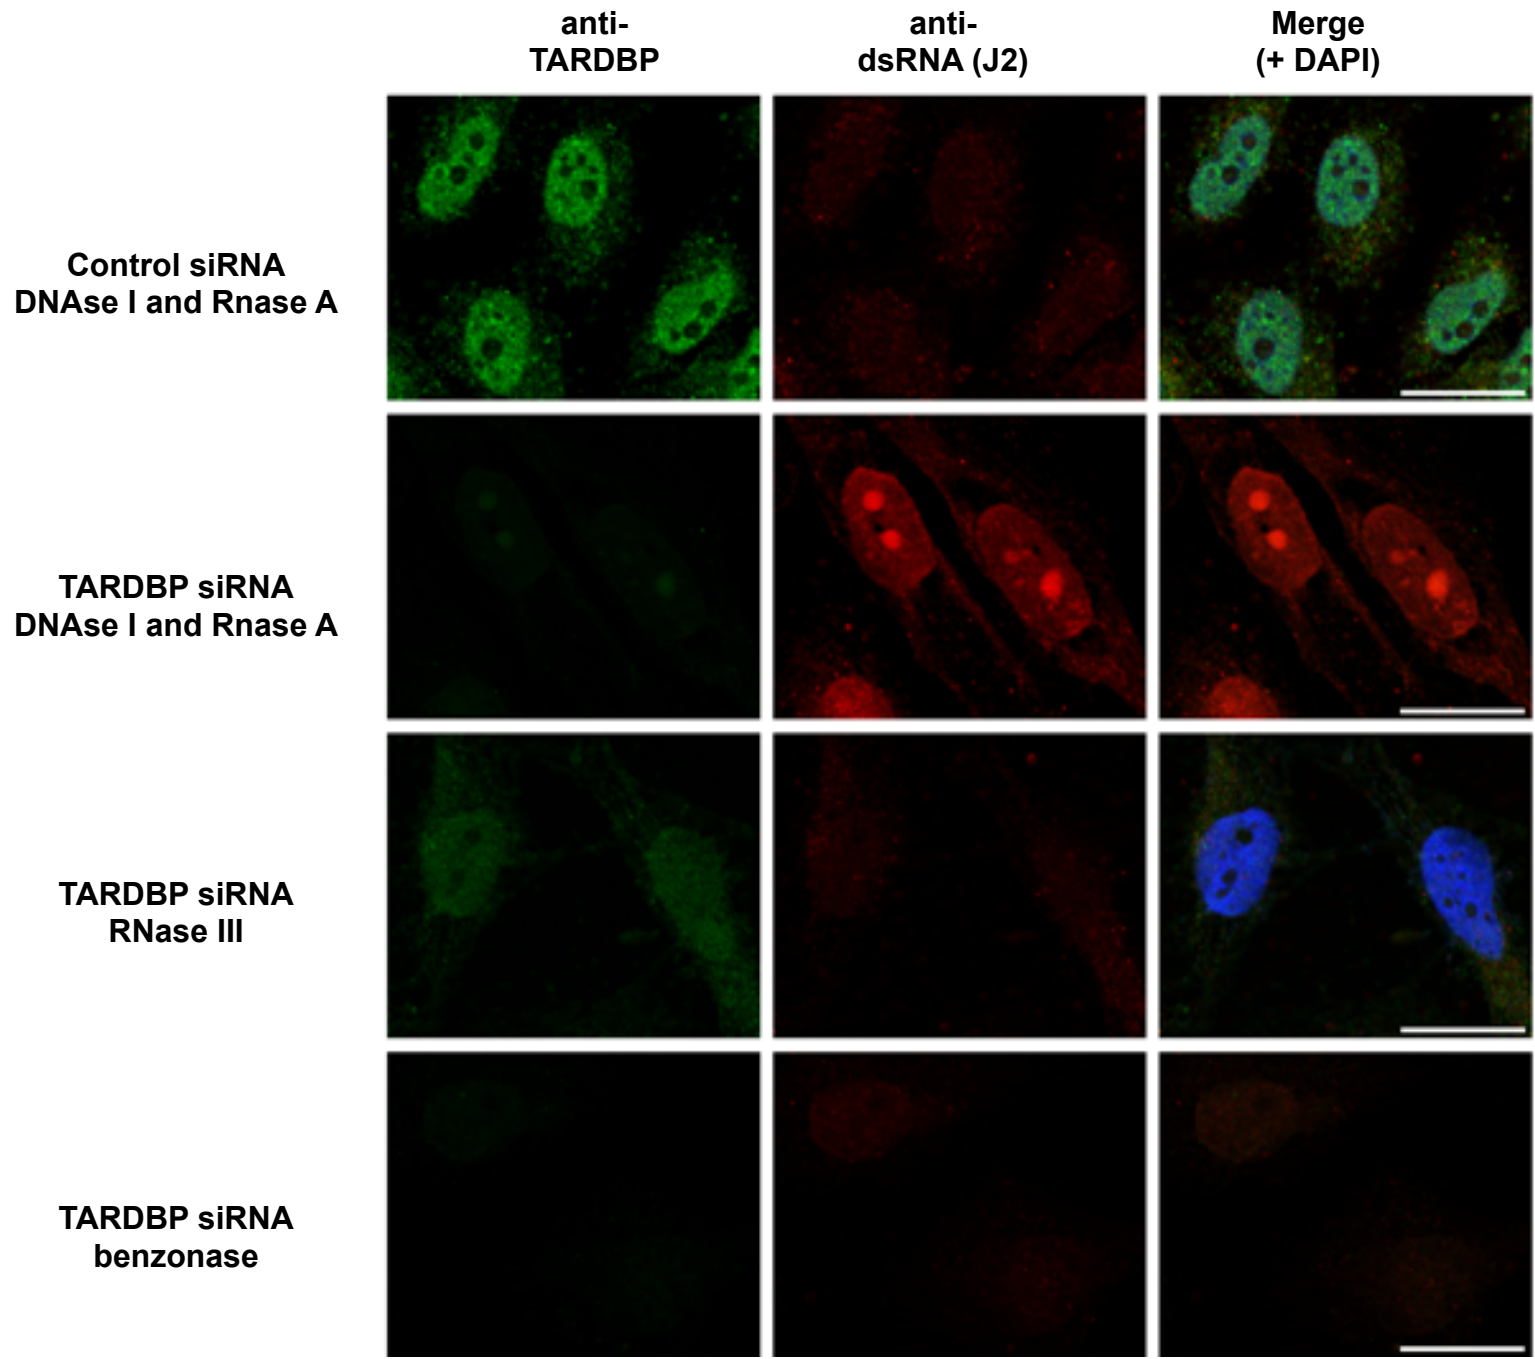

**A**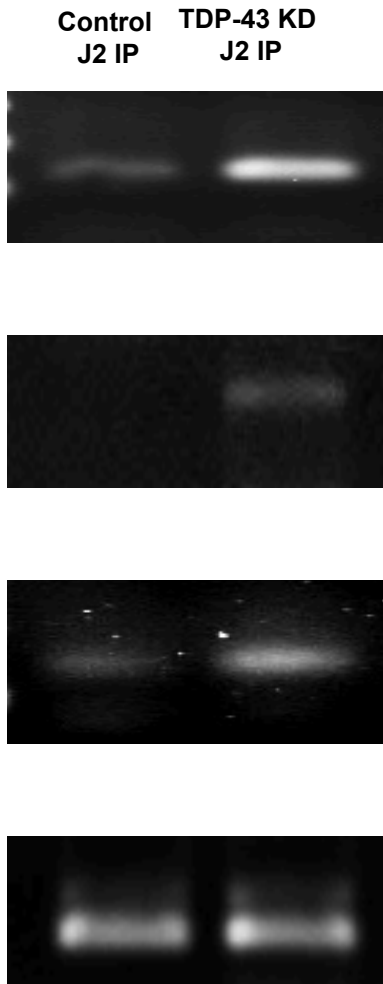**B**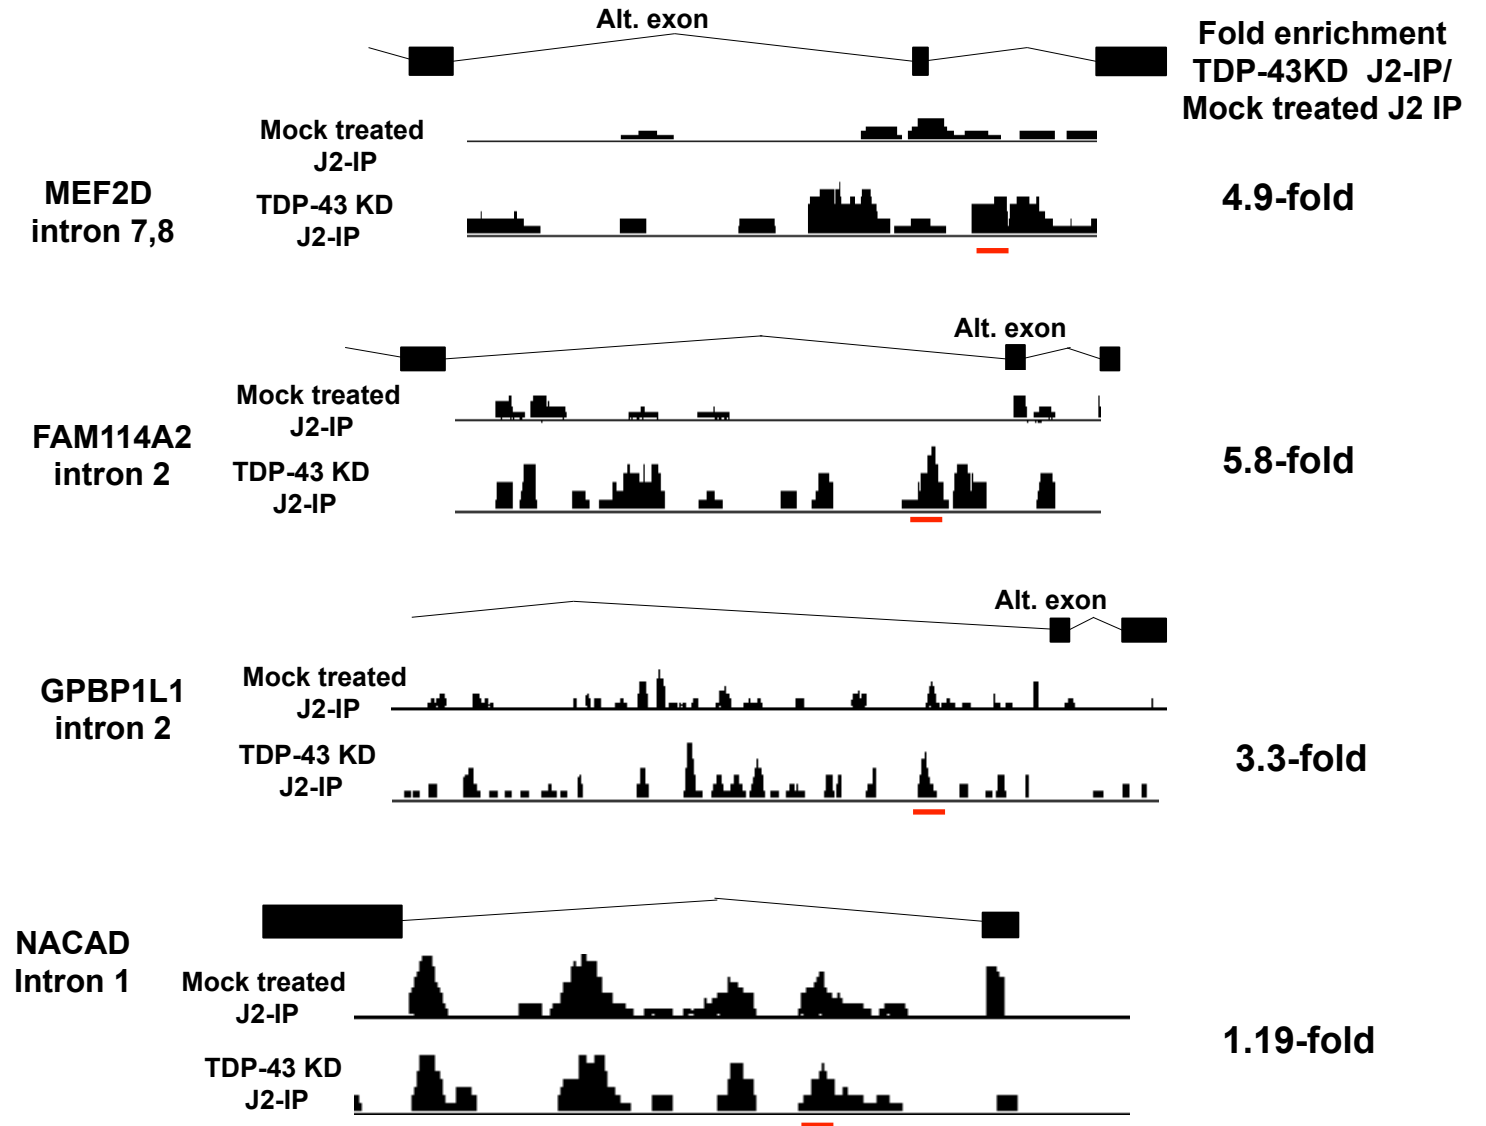

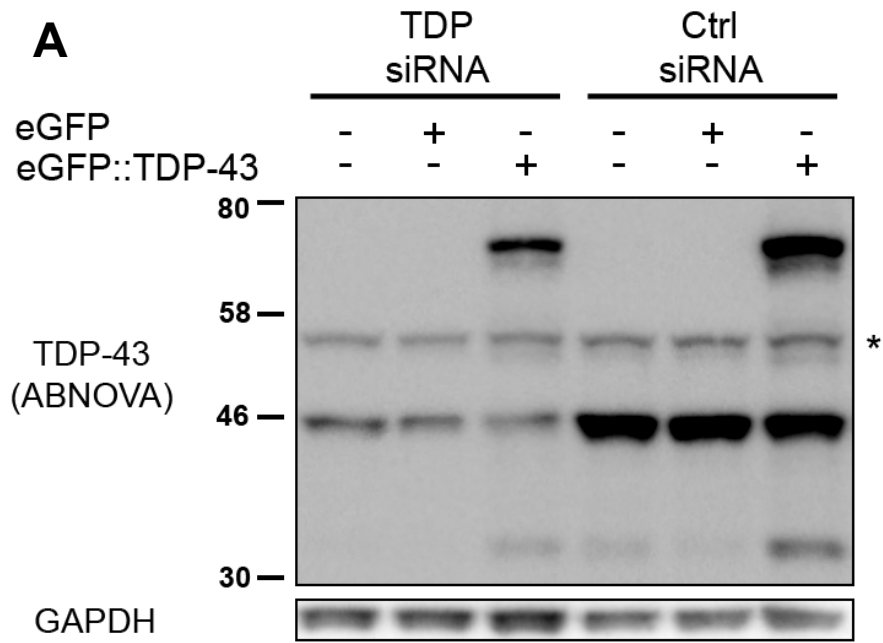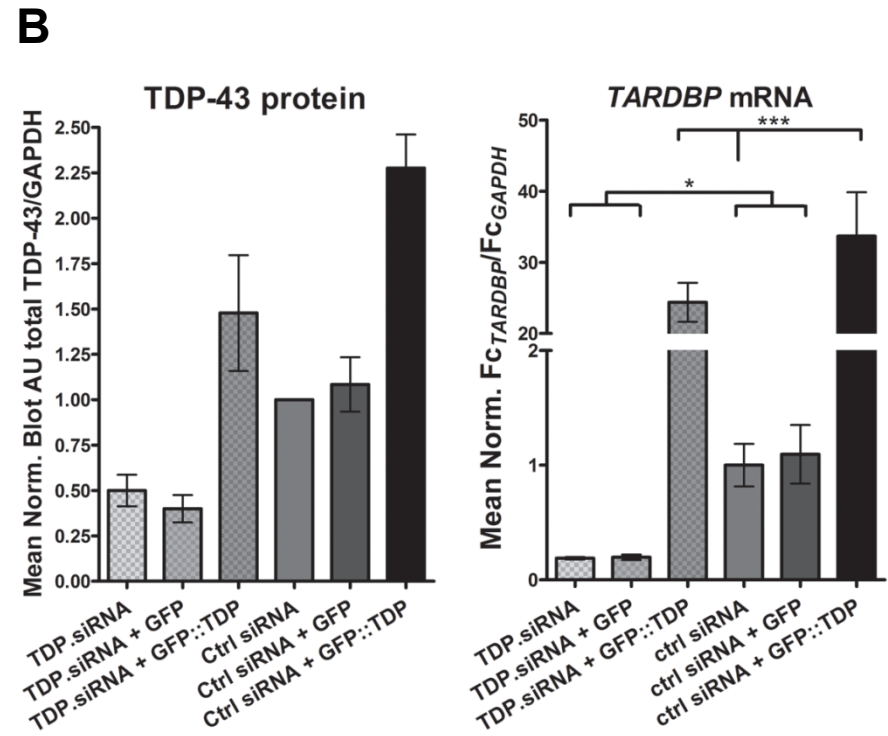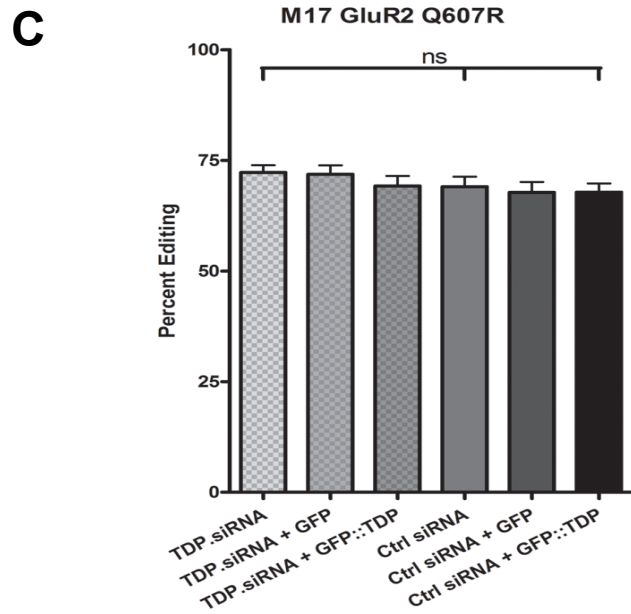

Supplement: embj0033-2947-sd1.pdf [file embj0033-2947-sd1.pdf]
