# Supplementary material for: TDP-1, the Caenorhabditis elegans ortholog of TDP-43, limits the accumulation of double-stranded RNA
Source: PubMed Central journal article supplement (PMC4282642; doi:10.15252/embj.201488740), 2014-11-12
Supplement: embj0033-2947-sd13.pdf [file embj0033-2947-sd13.pdf]

**Table S12:**

Strains used or created during the course of this study are listed below:

| Strain   | Genotype                                                                                                 | Source                                                                     |
|----------|----------------------------------------------------------------------------------------------------------|----------------------------------------------------------------------------|
| N2- CGCB | <i>Wild type</i>                                                                                         | CGC                                                                        |
| CL6311   | <i>tdp-1(ok803) // X8 outcross to CGC- N2B</i>                                                           | Original allele from CGC; University of Minnesota, MN, outcrossed in house |
| XQ8      | <i>tdp-1(ok781) // X5 outcross</i>                                                                       | Parker Lab                                                                 |
| CL2768   | <i>dvls100 (hsp-16.2/GFP::TDP-1 + pRF4 [rol-6(su1006)])</i><br>(Integrated array:<br>Chromosome unknown) | This study                                                                 |
| CL6172   | <i>Ptdp-1::GFP, tdp-1::mCherry</i>                                                                       | This study                                                                 |
| CL1787   | <i>rpl-28/NLS:GFP:ADR-2 dsRNA binding domain</i>                                                         | This study                                                                 |
