# Supplementary material for: TDP-1, the Caenorhabditis elegans ortholog of TDP-43, limits the accumulation of double-stranded RNA
Source: PubMed Central journal article supplement (PMC4282642; doi:10.15252/embj.201488740), 2014-11-12
Supplement: embj0033-2947-sd14.pdf [file embj0033-2947-sd14.pdf]

**Table S13:**

Primer sequences used to follow deletion mutations or for RT-PCRs are listed in table below.

| Gene target   | Experiment                                                       | Sequence                                                                                 |
|---------------|------------------------------------------------------------------|------------------------------------------------------------------------------------------|
| <i>gsa-1</i>  | Confirm anti-dsRNA IP<br>RNA-seq enrichment                      | Fwd: ggggtgctcggcgctggcgc<br>Rev: cagccagcggttgtccagatg                                  |
| <i>unc-61</i> | Confirm anti-dsRNA IP<br>RNA-seq enrichment                      | Fwd: cggtgacctcgtgttcatatcggag<br>Rev: gtgggagaagctctgcttgagcgg                          |
| <i>rgef-1</i> | Confirm anti-dsRNA IP<br>RNA-seq enrichment                      | Fwd: gtactgaatattacatcatcgtcatcag<br>Rev: ctccgagagctccatctagag                          |
| TC1           | Confirm anti-dsRNA IP<br>RNA-seq enrichment                      | Fwd: aaccgtaagcatggagggtg<br>Rev: cacatgacgacgttgaaacc                                   |
| <i>gfi-1</i>  | Confirm anti-dsRNA IP<br>RNA-seq enrichment                      | Fwd: gtacctcctgaactggcctaac<br>Rev: gaaacagttgatggctgtgtgg                               |
| <i>haf-6</i>  | Confirm anti-dsRNA IP<br>RNA-seq enrichment and<br>anti-TDP-1 IP | Fwd: caggctcgtcgtcctcag<br>Rev: ggcggtttcacccaatttc                                      |
| <i>let-2</i>  | Confirm anti-dsRNA IP<br>RNA-seq enrichment                      | Fwd: gaaatcccataaccaagacctcg<br>Rev: gagagccagtaagactgtcg                                |
| <i>mca-3</i>  | anti-TDP-1 IP                                                    | Fwd: cgataattgaaacccggttacgc<br>Rev: agactcgtataccctaatctgacacc                          |
| <i>ppfr-1</i> | anti-TDP-1 IP                                                    | Fwd: gcgtgtgccccagcagggc<br>Rev: cgctcaacggcgaggaaaggcgcc                                |
| <i>snx-6</i>  | anti-TDP-1 IP                                                    | Fwd: agcctcaaatcgatgaatagttcac<br>Rev: cgcgagagaaattccactttccag                          |
| <i>pme-3</i>  | anti-TDP-1 IP                                                    | Fwd: aggacattcccatcagaaaggcttc<br>Rev: cgaaaattcacaagccttgcgtcag                         |
| <i>npp-8</i>  | anti-TDP-1 IP                                                    | Fwd: gagaacatcggcgaacaggcgtgg<br>Rev: agcgcggtcgccgaccgctc                               |
| <i>map-2</i>  | anti-TDP-1 IP                                                    | Fwd: gagccccgaggagttggcg<br>Rev: cgaggcaccacggattcaagatc                                 |
| <i>gly-5</i>  | anti-TDP-1 IP                                                    | Fwd: gcgattcgtccgcccactc<br>Rev: agcgtcctcgcgtccgcccacttc                                |
| <i>pqn-41</i> | Detection of alternative<br>splicing                             | Fwd: cgtcgaacataaacaatcgat<br>Rev1: gcaacacgtcgcgttgcttc<br>Rev2: ctgcaactgctgctgttgctgc |
| <i>tdp-1</i>  | Detection of <i>ok803</i>                                        | Fwd: ttgcaagcatcgtttccgggtgc                                                             |

|                        |                                                                            |                                                                                                                                       |
|------------------------|----------------------------------------------------------------------------|---------------------------------------------------------------------------------------------------------------------------------------|
|                        | deletion                                                                   | Rev: gaattctgtgaacacgacgccatac                                                                                                        |
| <b><i>tdp-1</i></b>    | Detection of wild type DNA                                                 | Fwd: gtgttctctgaggtctgtgag<br>Rev: cagtagcgatcctttgctg                                                                                |
| <b><i>tdp-1</i></b>    | RT-PCR of <i>tdp-1</i> deletion alleles (N-term)                           | Fwd: atggccgacgaaacgccgaag<br>Rev: gacaacgctctgactctctcgctc                                                                           |
| <b><i>tdp-1</i></b>    | RT-PCR of <i>tdp-1</i> deletion alleles (C-term)                           | Fwd: atggccgacgaaacgccgaag<br>Rev: cactgatgacattctgac                                                                                 |
| <b>HervK*</b>          | RT-PCR of J2-IP in M17 human cell lysate                                   | Fwd: tccccttgaataactctgttttYgt<br>Rev: cattccttgggtaaaactttccaYtg                                                                     |
| <b><i>FAM114A2</i></b> | RT-PCR of J2-IP in M17 human cell lysate                                   | Fwd: cctcaagcaatcttcccctgcc<br>Rev: gaggaagagatggtacagtca                                                                             |
| <b><i>GPBP1L1</i></b>  | RT-PCR of J2-IP in M17 human cell lysate                                   | Fwd: ccattctttactctctctatcc<br>Rev: gctcacctctgaataaattcac                                                                            |
| <b><i>MEF2D</i></b>    | RT-PCR of J2-IP in M17 human cell lysate                                   | Fwd: ggtgtgtctgaatgaacataatacc<br>Rev: gctgtgcttaggtgccaagt                                                                           |
| <b><i>NCAD1</i></b>    | RT-PCR of J2-IP in M17 human cell lysate                                   | Fwd: gcctgtccaccttctctctcc<br>Rev: ggcgaggccaagattgaggacctg                                                                           |
| <b><i>FUS/TLS</i></b>  | RT-PCR of J2-IP in M17 human cell lysate                                   | Fwd: cccaactcccagcaatgctt<br>Rev: accctaccctttctggaggt                                                                                |
| <b><i>HP1BP3</i></b>   | RT-PCR of J2-IP in M17 human cell lysate                                   | Fwd: ccacatacaatggtggtccc<br>Rev: ctgggactacaggcgtgcacc                                                                               |
| <b><i>dnj-5</i></b>    | Verification of alternative splicing change in <i>tdp-1(ok803)</i> mutants | Fwd(1): gggctacttgcaagaagaacaag<br>Rev(1): gggaactgaactgggagatc<br>Rev(2): cgcacgttggctctctgtta                                       |
| <b><i>ikke-1</i></b>   | Verification of alternative splicing change in <i>tdp-1(ok803)</i> mutants | Fwd: cgcaggttgaagtgcggaatc<br>Rev: gtctagaaaatcagtgcttctgcc                                                                           |
| <b><i>kin-25</i></b>   | Verification of alternative splicing change in <i>tdp-1(ok803)</i> mutants | Fwd(1): gcctgtggcaggttctttcatcc<br>Rev(1): gcgatggagcagcaggttggtg<br>Fwd(2): gcctgtggcaggcaatgacagcg<br>Rev(2): cgaatggcggctctgactggt |
| <b><i>pmt-1</i></b>    | Verification of alternative splicing change in <i>tdp-1(ok803)</i> mutants | Fwd(1): ggatcaaactgtagccatgggt<br>Fwd(2): ttacaaaaagccatggtgaacg<br>Rev: cggtggtgaatcgcccgattcc                                       |
| <b><i>Y69H2.3</i></b>  | Verification of alternative splicing change in <i>tdp-</i>                 | Fwd(1): gtccggctactggctccacac<br>Rev(1): gtcagtctgcccagtcggtg                                                                         |

|                 |                                                                            |                                                                                                                                     |
|-----------------|----------------------------------------------------------------------------|-------------------------------------------------------------------------------------------------------------------------------------|
|                 | 1(ok803) mutants                                                           | Fwd(2): cagcgacaagagaccaagaatgc<br>Rev(2): ccaccaccagccaccaacctca                                                                   |
| <b>gly-5</b>    | Verification of alternative splicing change in <i>tdp-1(ok803)</i> mutants | Fwd: taatcaatgggtgattcggagac<br>Rev(1): cgacagcatccagtactgattcc<br>Rev(2): cgcactgttgccgacacctctctt                                 |
| <b>Y41E3.7</b>  | Verification of alternative splicing change in <i>tdp-1(ok803)</i> mutants | Fwd(1): gaaggctataaaaagacgcggaac<br>Rev(1): gcaggggtggaaggcaaatcc<br>Fwd(2): gacggtgacggtccgggtccc<br>Rev(2): cggatcaacacgtctgtctgc |
| <b>col-54</b>   | Verification of abundance change in <i>tdp-1(ok803)</i> mutant poly(A)-seq | Fwd: tccaataactgcctccgggag<br>Rev: gcttctcatctcaaataccaacg                                                                          |
| <b>gst-24</b>   | Verification of abundance change in <i>tdp-1(ok803)</i> mutant poly(A)-seq | Fwd: acgtcgagttgaggatgttc<br>Rev: ttggcaaggtagcggagaattgca                                                                          |
| <b>oac-29</b>   | Verification of abundance change in <i>tdp-1(ok803)</i> mutant poly(A)-seq | Fwd: cagaccaaactgatagactattgaatgc<br>Rev: aagtgttaagtgagatccatcg                                                                    |
| <b>ZC416.2</b>  | Verification of abundance change in <i>tdp-1(ok803)</i> mutant poly(A)-seq | Fwd: caacccaaatcagccacaag<br>Rev: ctatcacagcacacctctcc                                                                              |
| <b>pgp-8</b>    | Verification of abundance change in <i>tdp-1(ok803)</i> mutant poly(A)-seq | Fwd: tttgtttcagttgcccg<br>Rev: agcactgtcgttcatctag                                                                                  |
| <b>W02D7.5</b>  | Verification of abundance change in <i>tdp-1(ok803)</i> mutant poly(A)-seq | Fwd: tctcgaaatcagatagttctcc<br>Rev: cgaagtacacgattgcctttg                                                                           |
| <b>sip-1</b>    | Verification of abundance change in <i>tdp-1(ok803)</i> mutant poly(A)-seq | Fwd: aatcttgagggacacgttctc<br>Rev: gatgacggtgtggatgtgat                                                                             |
| <b>W02D7.11</b> | Verification of abundance change in <i>tdp-1(ok803)</i> mutant poly(A)-seq | Fwd: cacaactccaaggaagacctc<br>Rev: ctgaactcctgtggtctcttg                                                                            |
| <b>dod-3</b>    | Verification of abundance change in <i>tdp-1(ok803)</i> mutant poly(A)-seq | Fwd: agccatgtcccgaatgag<br>Rev: cgatgaattgttcgaatcctgg                                                                              |
|                 |                                                                            |                                                                                                                                     |

\* HervK primer sequences taken from Douville et. al, 2011.
