# Supplementary material for: TDP-1, the Caenorhabditis elegans ortholog of TDP-43, limits the accumulation of double-stranded RNA
Source: PubMed Central journal article supplement (PMC4282642; doi:10.15252/embj.201488740), 2014-11-12
Supplement: embj0033-2947-sd15.pdf [file embj0033-2947-sd15.pdf]

**Table S14:**

Table lists all sequencing libraries created in this study along with relevant details and mapping parameters.

| RNA sample                      | Library purpose               | Primers | Prep kit           | Run type             | Mapping parameters                                                                                                                                                                                                                                                                          |
|---------------------------------|-------------------------------|---------|--------------------|----------------------|---------------------------------------------------------------------------------------------------------------------------------------------------------------------------------------------------------------------------------------------------------------------------------------------|
| N2-CGC B L4-20C (x2)            | Gene abundance quantification | Poly(A) | Illumina true seq. | 100-single           | Tophat2 --b2-very-sensitive -i 30 -l 5000 --read-edit-dist 3 -N 3 --read-realign-edit-dist 0 --segment-length 25 --segment-mismatches 2 --no-coverage-search --min-coverage-intron 30 --max-coverage-intron 5000 --min-segment-intron 30 --max-segment-intron 5000                          |
| <i>tdp-1(ok803)</i> L4 20C (x2) | Gene abundance quantification | Poly(A) | Illumina true seq. | 100-single           | Tophat2 --b2-very-sensitive -i 30 -l 5000 --read-edit-dist 3 -N 3 --read-realign-edit-dist 0 --segment-length 25 --segment-mismatches 2 --no-coverage-search --min-coverage-intron 30 --max-coverage-intron 5000 --min-segment-intron 30 --max-segment-intron 5000                          |
| N2-CGC B L4-20C                 | Alternative splicing analysis | Poly(A) | Illumina true seq. | 76-Paired-high depth | Tophat2 --b2-very-sensitive -r 198 --mate-std-dev 18 -i 30 -l 5000 --read-edit-dist 3 -N 3 --read-realign-edit-dist 0 --segment-length 25 --segment-mismatches 2 --no-coverage-search --min-coverage-intron 30 --max-coverage-intron 5000 --min-segment-intron 30 --max-segment-intron 5000 |
| <i>tdp-1(ok803)</i> L4-20C      | Alternative Splicing Analysis | Poly(A) | Illumina true seq. | 76-Paired-high depth | Tophat2 --b2-very-sensitive -r 195 --mate-std-dev 18 -i 30 -l 5000 --read-edit-dist 3 -N 3 --read-realign-edit-dist 0 --segment-length 25 --segment-mismatches 2                                                                                                                            |

|                                                                        |                                                                 |               |                                            |            |                                                                                                                                                                                                                                                                           |
|------------------------------------------------------------------------|-----------------------------------------------------------------|---------------|--------------------------------------------|------------|---------------------------------------------------------------------------------------------------------------------------------------------------------------------------------------------------------------------------------------------------------------------------|
|                                                                        |                                                                 |               |                                            |            | --no-coverage-search<br>--min-coverage-intron 30<br>--max-coverage-intron 5000 --min-segment-intron 30 --max-segment-intron 5000                                                                                                                                          |
| <b>N2-CGC B L4-20C (x3)</b>                                            | A-to-I RNA editing analysis                                     | random primed | Illumina true seq.                         | 100-Paired | Bfast – See <b>Supplemental Table 16</b>                                                                                                                                                                                                                                  |
| <b><i>tdp-1(ok803)</i> L4 20C (x3)</b>                                 | A-to-I RNA editing analysis                                     | random primed | Illumina true seq.                         | 100-Paired | Bfast – See <b>Supplemental Table 16</b>                                                                                                                                                                                                                                  |
| <b><i>adr-2(gv42)</i> L4 20C</b>                                       | A-to-I RNA editing analysis                                     | random primed | Illumina true seq.                         | 100-Paired | Bfast – See <b>Supplemental Table 16</b>                                                                                                                                                                                                                                  |
| <b>N2-CGC Young Adult-15C input RNA and J2-IP'ed RNA x3)</b>           | J2-IP enrichment identification                                 | random primed | scriptseq v2 strand specific               | 100-single | <i>Tophat --b2-very-sensitive -i 30 -l 5000 --read-edit-dist 3 -N 3 --read-realign-edit-dist 0 --segment-length 25 --segment-mismatches 2 --no-coverage-search --min-coverage-intron 30 --max-coverage-intron 5000 --min-segment-intron 30 --max-segment-intron 5000.</i> |
| <b><i>tdp-1(ok803)</i> Young adult (Input RNA and J2-IP'ed RNA x3)</b> | J2-IP enrichment identification                                 | random primed | scriptseq v2 strand specific               | 100-single | <i>Tophat --b2-very-sensitive -i 30 -l 5000 --read-edit-dist 3 -N 3 --read-realign-edit-dist 0 --segment-length 25 --segment-mismatches 2 --no-coverage-search --min-coverage-intron 30 --max-coverage-intron 5000 --min-segment-intron 30 --max-segment-intron 5000.</i> |
| <b>N2- CGC B Young Adult-20C (x2 and X1 with RNase)</b>                | Identification of TDP-1 sites of co-transcriptional association | -             | ChIP-Seq DNA Sample Prep Kit (IP-102-1001) | 50-single  | bowtie -l 47 -n 1 -y --best                                                                                                                                                                                                                                               |

|                                                                          |                                        |                      |                                                 |                    |                                                                                                                                                                                                                                       |
|--------------------------------------------------------------------------|----------------------------------------|----------------------|-------------------------------------------------|--------------------|---------------------------------------------------------------------------------------------------------------------------------------------------------------------------------------------------------------------------------------|
| <p><b>Human M17 cells mock treated or treated with Tardbp siRNAs</b></p> | <p>J2-IP enrichment identification</p> | <p>random primed</p> | <p>Scriptseq v2 strand specific (RT 55-59C)</p> | <p>100- Paired</p> | <p>Trim 1 off 5', 10 off 3', filter 20<br/> tophat2 --b2-very-sensitive -N 2 --read-realign-edit-dist 0 --library-type frsecondstrand -p 10 -r 157 --mate-std-dev 50 --segmentlength 25 --segmentmismatches 2 --nocoverage-search</p> |
|--------------------------------------------------------------------------|----------------------------------------|----------------------|-------------------------------------------------|--------------------|---------------------------------------------------------------------------------------------------------------------------------------------------------------------------------------------------------------------------------------|
