# Supplementary material for: TDP-1, the Caenorhabditis elegans ortholog of TDP-43, limits the accumulation of double-stranded RNA
Source: PubMed Central journal article supplement (PMC4282642; doi:10.15252/embj.201488740), 2014-11-12
Supplement: embj0033-2947-sd16.pdf [file embj0033-2947-sd16.pdf]

**Table S15:**

Table list *Bfast* parameters used in mapping of total RNA to capture RNA editing and allow downstream quantification.

| <b>Input Parameter</b>                                                       | <b>Value</b>                     |
|------------------------------------------------------------------------------|----------------------------------|
| FASTQ file                                                                   | 48: Input_file.fq                |
| Conditional (refGenomeSource)                                                | 1                                |
| Select a reference from history                                              | 25: ws220_genomic.fa             |
| Specify the mask                                                             | 1111111111111111                 |
| Hash Width                                                                   | 14                               |
| Specify the mask                                                             | 1111101110111010100101011        |
| Hash Width                                                                   | 14                               |
| Specify the mask                                                             | 10111101011010010110000110100011 |
| Hash Width                                                                   | 14                               |
| Specify the mask                                                             | 10111001101001100100111101010001 |
| Hash Width                                                                   | 14                               |
| Specify the mask                                                             | 111110110111011110111            |
| Hash Width                                                                   | 14                               |
| Specify the mask                                                             | 111111100101001000101111101      |
| Hash Width                                                                   | 14                               |
| Specify the mask                                                             | 111101011100101000101011010101   |
| Hash Width                                                                   | 14                               |
| Specify the mask                                                             | 111101101011011001100000101101   |
| Hash Width                                                                   | 14                               |
| Specify the mask                                                             | 11110110100010001101011001011001 |
| Hash Width                                                                   | 14                               |
| Specify the mask                                                             | 111101001011011010111001011      |
| Hash Width                                                                   | 14                               |
| Do not index lower case sequences                                            | False                            |
| Conditional (indexing_option)                                                | 0                                |
| Conditional (params)                                                         | 1                                |
| Truncate key size in 'match'                                                 | -1                               |
| The maximum number of matches to allow before a key is ignored               | 75                               |
| The maximum number of matches to allow before a read is discarded            | 400                              |
| The strands to consider                                                      | Both strands                     |
| Scoring Matrix file used to score the alignments                             | No dataset                       |
| Perform ungapped local alignment                                             | False                            |
| Perform unconstrained local alignment                                        | False                            |
| The number of bases before and after each hit to consider in local alignment | 20                               |
| The average mismatch quality                                                 | 10                               |
| Conditional (localalign_params)                                              | Unique alignments                |

|                                   |       |
|-----------------------------------|-------|
| Disallow pairing                  | True  |
| Reverse paired ends               | False |
| Suppress the header in the output | False |
| SAM file                          |       |
