# Supplementary material for: TDP-1, the Caenorhabditis elegans ortholog of TDP-43, limits the accumulation of double-stranded RNA
Source: PubMed Central journal article supplement (PMC4282642; doi:10.15252/embj.201488740), 2014-11-12
Supplement: embj0033-2947-sd21.pdf [file embj0033-2947-sd21.pdf]

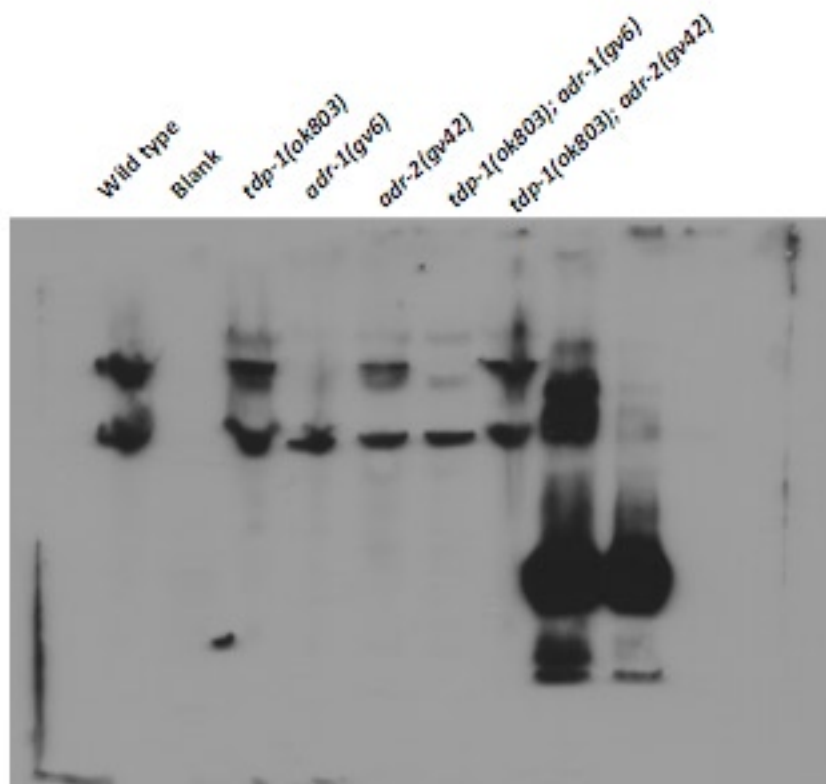

Raw data – Supplemental Figure 7
